1 **Planar Cell Polarity: What Does The *prickle* Gene Do?**

2

3

4 José Casal<sup>1</sup>, Beatriz Ibáñez-Jiménez and Peter A. Lawrence<sup>2</sup>

5

6

7

8

9

10 Department of Zoology, University of Cambridge, Downing Street,  
11 Cambridge CB2 3EJ, United Kingdom

12 <sup>1</sup>jec85@cam.ac.uk

13 <sup>2</sup>pal38@cam.ac.uk

14

## 15 ABSTRACT

16 Many, if not all, epithelial cells are polarised within the plane of the epithelium and  
17 some form oriented structures whose coordinated and consistent polarity (planar cell  
18 polarity, PCP) relates to the principal axes of the body or organ. PCP depends on  
19 intercellular communication of polarity signals; in *Drosophila* at least two separate  
20 molecular systems generate these signals: Dachous/Fat, Ds/Ft and the core or Stan  
21 system and both are conserved widely (reviewed in [Butler and Wallingford, 2017](#)).  
22 Here we make a new attempt to understand the PCP gene *prickle* (*pk*) and its products  
23 Pk and Sple. Much research on PCP has asked how and why many PCP proteins,  
24 including Pk and Sple, are asymmetrically localised in the cell ([Strutt and Strutt,](#)  
25 [2009](#)). This question led to the *pk* gene being placed at the heart of the core or Stan  
26 system ([Tree et al., 2002b](#)). Here we use direct genetic tests to ask if this view is correct  
27 and if and how the *pk* gene relates to the Stan and the Ds/Ft systems. We conclude  
28 that Pk and Sple have been widely misunderstood: we find they can affect, separately,  
29 the Ds/Ft system (reversing, or rectifying the polarity of its output) and the core or  
30 Stan system (being required for the asymmetrical distribution of its proteins). In the  
31 Stan system they appear to work via binding to Vang. Neither Pk nor Sple are essential  
32 components of either the Ds/Ft or the Stan systems nor do they act as a bridge  
33 between the two systems.

## 34 INTRODUCTION

35 Planar cell polarity (PCP) refers to a property that all, or most, epithelial cells have —  
36 they are coordinately oriented in the plane of the epithelial sheet and, sometimes,  
37 demonstrate this by forming oriented structures. These structures can be cell  
38 organelles such as cilia, or multicellular organs such as mammalian hairs ([Tree et al.,](#)  
39 [2002a](#); [Wang and Nathans, 2007](#); [Goodrich and Strutt, 2011](#); [Butler and Wallingford,](#)  
40 [2017](#)). *Drosophila* has been used to identify most of the PCP genes and is the most  
41 amenable of all animals for elucidating the mechanisms of PCP. PCP genes coordinate  
42 the polarity of a group of cells, a polarity that is related to the principal axes of the  
43 body or organ. During the last 20 years, researchers have investigated how gene  
44 products required for PCP are asymmetrically localised in the cell and studied the  
45 propagation of polarity from cell to cell. One PCP gene, *prickle* (*pk*), has a particularly  
46 chequered history. Here we make another experimental attempt to understand it.  
47 [Figure 1](#) is a Baedeker of all the experiments and results.

## 48 A brief history of Pk

49 The *pk* mutant was discovered in 1938 by Ives who described the thoracic bristles as  
50 disoriented: “irregularly erected and whorled, giving a prickle effect” ([Ives, 1947](#)).  
51 Later, a similar and closely linked mutation *spiny legs* (*sple*) was found ([Gubb and](#)  
52 [Garcia-Bellido, 1982](#)). Each mutation affects one of two homologous transcripts of the  
53 *pk* gene encoding the Pk and Sple proteins; both proteins contain protein-protein

54 binding LIM domains, differ in the N terminus, (Gubb et al., 1999) and have sequence  
55 elements conserved to vertebrates. In vertebrates, syndromes due to *pk* mutations  
56 have been classified, somewhat impetuously, as planar polarity phenotypes (Tissir and  
57 Goffinet, 2013).

#### 58 **(i) Pk: a founding member of the “core” PCP pathway**

59 In the 1990s, the *pk* gene was grouped with a few other genes that affected polarity;  
60 their proteins constituted the “core system”, all being asymmetrically but briefly  
61 localised in the cell; for example, Pk is enriched on or near the proximal membrane of  
62 each wing cell (Tree et al., 2002b), while Frizzled (Fz) is localised distally (Strutt,  
63 2001). Other core proteins include Vang Gogh (Vang), Dishevelled (Dsh) and Starry  
64 Night (Stan), also known as Flamingo (for a review see Butler and Wallingford, 2017).  
65 The localisation of these proteins is mutually dependent; when one protein is removed  
66 the others become evenly distributed around the cell periphery (reviewed in Strutt and  
67 Strutt, 2009). These observations led to a hypothesis that sets of core proteins associate  
68 asymmetrically on the wing cell membrane, proximally or distally, as a response to the  
69 direction of slope of a tissue-wide polarising gradient (Tree et al., 2002a; Strutt and  
70 Strutt, 2008; Strutt, 2009). Tree et al (2002b) then built a model in which Dsh, Pk and  
71 Fz interact with each other to amplify their asymmetric localisation within the cell.  
72 They argued that “*planar cell polarity signaling in Drosophila requires the receptor*  
73 *Frizzled and the cytoplasmic proteins Dishevelled and Prickle.*” Perhaps most  
74 significantly they proposed that Pk in one cell interacts or “*is linked*” to the  
75 localisation of Fz and Dsh in the adjacent cell, ie there is an intercellular bridge  
76 consisting of two different complexes facing each other across the cell membrane. Pk  
77 was thought to be an essential factor in this bridge and therefore proposed to have a  
78 central role in intercellular “*signalling*”. This view of Pk has been repeated so many  
79 times in the literature that it has come to be accepted as true.

#### 80 **(ii) Pk is not needed for PCP signalling by the Stan system**

81 Nevertheless, the functional relevance of Pk to intercellular signalling by the core  
82 system suffered two severe blows when, first, Adler et al (2000) found that a weak  
83 allele of *pk* did not reduce polarisation caused by clones mutant for other core genes.  
84 Then, second, Lawrence et al. (2004) reported that the complete loss of Pk and Sple  
85 increases polarisation by the core system genes; they proposed that the key molecules  
86 in the core system are Stan, Fz and Vang. They renamed the core system the “Stan  
87 system” to emphasise the unique and central role of Stan; we use this name from now  
88 on. This conclusion was later supported by Strutt and Strutt (Strutt and Strutt, 2007)  
89 who presented further evidence that “*Dishevelled, Prickle and Diego are not needed for*  
90 *intercellular communication*”.

91 **(iii) What are the functions of Pk and Sple?**

92 In the dorsal abdomen, when *pk* is overexpressed everywhere, polarity of the A  
93 compartment is almost entirely reversed while the P compartment is normal. By  
94 contrast, when *sple* is overexpressed everywhere, polarity of the P compartment is  
95 completely reversed while the A compartment is normal (Lawrence et al., 2004).  
96 These results allow the hypothesis that Pk and Sple have similar basic functions (to  
97 turn around polarity): the outcome depending on the distribution of both proteins  
98 and varied regional responses to them (Gubb and Garcia-Bellido, 1982). For example,  
99 in the wildtype, Pk is thought to be most effective in the wing, in the P compartment  
100 of the abdomen and the posterior part of the thorax while Sple predominates in the A  
101 compartment of the abdomen and anterior region of the thorax (Gubb et al., 1999;  
102 Ayukawa et al., 2014; Merkel et al., 2014; Ambegaonkar and Irvine, 2015).

103 It was widely thought that upstream polarity information (given by the direction  
104 of slopes of gradients of Ds and Four-jointed (Fj) activity) is interpreted by the Stan  
105 system (Yang et al., 2002; Ma et al., 2003; reviewed in Butler and Wallingford, 2017).  
106 However, no clear evidence was offered as to how the two systems might be linked.  
107 Some experiments in the adult abdomen had argued that gradient slopes of Ds and Fj  
108 have different signs in the anterior (A) and the posterior (P) compartments (Casal et  
109 al., 2002). If these slopes were to be read by the Stan system, since all the hairs point  
110 backwards in the wildtype, at least one set of hairs (in either the A or the P  
111 compartment) must point in the opposite way, with respect to the Ds gradient, to the  
112 other set. Based on experimental evidence it was proposed that Pk or Sple might  
113 rectify the reading of one of these gradients to ensure that that the Stan system points  
114 all hairs in the same direction (Lawrence et al., 2004). However, later experiments  
115 argued that the Stan system and the Ds/Ft system act independently of each other  
116 (Casal et al., 2006; Lawrence et al., 2007; and more recently Brittle et al., 2012) —  
117 implying that rectification is not to alter a direct input from the Ds/Ft system into the  
118 Stan system but to avoid dissonance between their independent inputs into PCP.

119 **(iv) Current views of the *pk* gene**

120 Recent papers (Olofsson et al., 2014; Ambegaonkar and Irvine, 2015; Strutt et al.,  
121 2016) still judge *pk* to be a key member of the Stan system. They show that Pk and  
122 Sple act discordantly on polarity output in different tissues and have improved the  
123 evidence that Pk and Sple can turn around the orientation of polarised structures  
124 (Ayukawa et al., 2014). Some still hold to the earlier hypothesis that the Ds/Ft system  
125 functions via the Stan system; these authors envisage Pk and Sple as components of a  
126 Stan system that interprets the Ds/Ft gradients of activity (see discussion). Here we  
127 provide experimental evidence that much of this view is wrong: we conclude that Pk  
128 and Sple are neither essential nor active components of either system nor do they  
129 function as a bridge between the two systems. Instead, Pk and Sple rectify the polarity  
130 outputs of the Ds/Ft system and, separately, modulate the output of the Stan system.

## 131 RESULTS

### 132 Explaining terms and methods

133 We use genetic mosaics to ask how the two different genetic systems, the Ds/Ft system  
134 and the Stan system, define cell polarity in the anterior (A) and posterior  
135 compartments (P) of the adult abdomen. We assay function of the Ds/Ft system by  
136 the ability of “sending cells” in clones that, say, overexpress *ft*, to change the polarity  
137 of “receiving cells” nearby the clone. As a result, hairs and bristles around the clones  
138 may point “inwards” or “outwards”, that is, in or away from the clone. For the Ds/Ft  
139 system, Ds, Ft and Dachs (D) are each essential; however removal of only Ds or Ft  
140 causes a misdistribution of the D protein in each cell (Ambegaonkar et al., 2012; Pan  
141 et al., 2013), leading to an adventitious phenotype of whorly polarity (Ambegaonkar et  
142 al., 2012; Lawrence and Casal, 2013). Therefore the cleanest way to break the Ds/Ft  
143 system completely and persuasively is to remove D as well as Ds or Ft. To break the  
144 Stan system we remove Stan; *stan*<sup>-</sup> cells cannot send or receive signals, for example  
145 *stan*<sup>-</sup> receiving cells cannot respond to cells that overexpress *fz* (Lawrence et al., 2004).  
146 Using these functional assays we ask whether and how Pk and Sple cooperate with the  
147 Ds/Ft and the Stan systems.

### 148 Do the Ds/Ft and Stan systems act independently in both A and P 149 compartments?

#### 150 (i) clones affecting the Ds/Ft system function when the Stan system is broken

151 Clones overexpressing *ft* polarise both wildtype cells (Genotype 2) and cells in which  
152 the Stan system is broken —we used flies lacking *stan*, (Genotype 3) or, in the case of  
153 A clones, both *stan* and *fz* (Casal et al., 2006). In both cases the receiving cells tend to  
154 point hairs outwards from the clone in the A compartments (Casal et al., 2006) and  
155 inwards in the P compartments (Figures 2 and 3). Consistent with these results, clones  
156 overexpressing the extracellular domain of Ds also polarise both wildtype cells  
157 (Genotype 4) and cells in which the Stan system is broken (*stan*<sup>-</sup> Genotype 5), inwards  
158 in A compartments (Casal et al., 2002; Casal et al., 2006); however these clones are  
159 ineffective in P compartments (Figure S3).

#### 160 (ii) clones affecting the Stan system function when the Ds/Ft system is broken

161 Clones that overexpress *fz*, in either the A or P compartments, normally turn the  
162 polarity of receiving cells to point outwards from the clone in A (Casal et al., 2006)  
163 and also in P (Genotype 6, Figure S2). They do the same in *ds*<sup>-</sup> flies but with a longer  
164 range (Genotype 7, Adler et al., 1998; Ma et al., 2003; and Casal et al., 2006; Figure S1).

165 These experiments establish that the two systems act independently; we now ask  
166 are Pk and Sple part of either the Ds/Ft or the Stan systems?

## 167 **How do Pk and Sple interact with each of the two systems?**

### 168 **(i) evidence from epistasis**

169 *ds<sup>-</sup>* and *pk-sple<sup>-</sup>* flies differ in phenotype in the dorsal abdomen: the most useful  
170 difference is seen in the P compartment, where, in *ds<sup>-</sup>* flies, hairs in the anterior region  
171 of the P compartment are in whirls (probably due to the misdistribution of Dachs) but  
172 in its posterior part the hairs point anteriorward. By contrast, in *pk-sple<sup>-</sup>* flies, the  
173 entire P compartment has normal polarity (Lawrence et al., 2004). We find that, in the  
174 abdomen, *ds<sup>-</sup> pk-sple<sup>-</sup>* flies (Genotype 8) are identical to *ds<sup>-</sup>* flies (Figure 1). It follows  
175 that the *ds* mutation is epistatic to the *pk* and *sple* mutations. By contrast, when *pk-*  
176 *sple<sup>-</sup> stan<sup>-</sup>* flies are compared to each single mutant, they differ from both, having an  
177 additive phenotype (Figure 1). These results suggest that Pk and Sple may act  
178 separately on each of the two systems.

### 179 **(ii) The Stan system functions well, both in cells that lack *pk* and *sple* and in** 180 **cells that have *pk* or *sple* overexpressed**

181 1. In *pk-sple<sup>-</sup>* flies. In the abdomen of *pk-sple<sup>-</sup>* flies (Genotype 9), polarity of most of  
182 the A compartment is reversed, but the P compartment is normal. Clones of cells that  
183 overexpress *fz* (Genotype 10 or, alternatively, lack *fz*, Genotype 11) in such *pk-sple<sup>-</sup>*  
184 flies strongly polarise receiving cells in both A and P compartments; in both  
185 compartments the clones affect mutant receiving cells with the same sign as in  
186 wildtype receiving cells, that is outwards from the clones that overexpress *fz* and  
187 inwards towards clones that lack *fz*, independently of the prevailing polarity of the  
188 receiving cells (Figure S2). Thus, the Stan system does not need Pk or Sple to send  
189 polarity signals or to repolarise receiving cells (cf Lawrence et al., 2004).

190 2. When *pk* or *sple* are overexpressed. In flies in which either *sple* (Genotype 12) or *pk*  
191 (Genotype 13) are overexpressed, *fz<sup>-</sup>* clones polarise receiving cells of both  
192 compartments inwards (as they do in wildtype flies), independently of the prevailing  
193 polarity of those receiving cells (Figure 6). All these results are mutually consistent:  
194 they show that polarity changes induced by the Stan system do not require products of  
195 the *pk* gene, suggesting that Pk and Sple do not act as integral parts of the Stan system  
196 in the wildtype.

197 However, the *fz<sup>-</sup>* clones do not behave exactly as they would in a wildtype  
198 background:

199 3. Absence or excess of Pk and Sple change the amount of polarisation caused by  
200 clones with altered amounts of Fz. In A compartments of the abdomen, clones of cells  
201 that lack *fz* alter polarity of surrounding wildtype cells. The number of rows of  
202 receiving cells affected, the range, varies with the amount of Pk and/or Sple protein: in  
203 *pk-sple<sup>-</sup>* flies (Genotype 11) the range of polarisation due to *fz<sup>-</sup>* clones or excess *fz*  
204 (Lawrence et al., 2004 Figure 4) is increased, resembling the increase in range  
205 observed when *fz<sup>-</sup>* clones are induced in *ds<sup>-</sup>* flies (Genotype 14). Raising the level of Pk

206 ubiquitously does not change that range (**Genotype 13**), while when Sple levels are  
207 raised (**Genotype 12**), polarisation is reduced (**Figure S5**). In the P compartments, we  
208 detected no effects on range; either in *pk-sple<sup>-</sup>* flies or when the levels of either Pk or  
209 Sple were increased (**Figures S2 and S5**). These results show that the Stan system can  
210 function independently of Pk and Sple.

### 211 **(iii) Pk and Sple alter polarity even when the Stan system is broken**

212 Uniform overexpression of *pk* causes large changes of polarity of *stan<sup>-</sup>* (**Genotype 15**)  
213 cells in the A compartment, without affecting the P compartment (**Figure 4**). Likewise,  
214 generalised overexpression of *sple* in flies with a broken Stan system (*stan<sup>-</sup>*, **Genotype**  
215 **16**) affects polarity of the P compartment of the abdomen, without affecting the A  
216 compartment: there is disturbance of polarity, with much reversal, although less than  
217 in *stan<sup>+</sup>* flies (**Figure 5**). These results show that Pk and Sple can function  
218 independently of the Stan system.

### 219 **(iv) Pk and Sple affect PCP even when the Ds/Ft system is broken**

220 1. General overexpression of *pk* or *sple* in a broken Ds/Ft system. If Pk and Sple acted  
221 exclusively on the Ds/Ft system, one would expect Pk and Sple proteins not to affect  
222 PCP if the Ds/Ft system were broken. But we find that ubiquitous overexpression of  
223 *pk* alters polarity of the A compartment (and part of the P compartment) in either *ds<sup>-</sup>*  
224 *pk-sple<sup>-</sup>* (**Genotype 17**, not shown), *d<sup>-</sup>* (**Genotype 18**, **Figure S4**) or in *ft<sup>-</sup> d<sup>-</sup>* flies  
225 (**Genotype 19**, **Figure 4**). Similarly, general overexpression of *sple* affects the polarity  
226 of the P compartment of the abdomen both in *ds<sup>-</sup> pk-sple<sup>-</sup>* (**Genotype 20**, not shown),  
227 *d<sup>-</sup>* (**Genotype 21**, **Figure S4**) and *ft<sup>-</sup> d<sup>-</sup>* flies (**Genotype 22**, **Figure 5**).

228 In *d<sup>-</sup>* flies, the A and P compartments are largely normal but a section of the P  
229 compartment is reversed, as in *ds<sup>-</sup>* (or *ft<sup>-</sup>*) flies. When ubiquitous Pk is added to *d<sup>-</sup>* or  
230 *ft<sup>-</sup> d<sup>-</sup>* flies, the anterior part of the A compartment is altered to point forwards and the  
231 reversed rear section of the P compartment is “rescued”. Thus Pk affects both the A  
232 and the P compartment in these flies. However, unlike Pk, ubiquitous Sple affects *d<sup>-</sup>*  
233 and *ft<sup>-</sup> d<sup>-</sup>* flies differentially: in a *d<sup>-</sup>* background there is no change to the A  
234 compartment, but the whole P compartment is largely reversed. But, in a *ft<sup>-</sup> d<sup>-</sup>*  
235 background the anterior region of the A compartment points laterally and the P  
236 compartment is “rescued”, having a normal orientation — indeed Pk and Sple have  
237 similar effects on *ft<sup>-</sup> d<sup>-</sup>* but very different effects on *d<sup>-</sup>* flies. It follows that Ft has  
238 outputs that are independent of D and that these outputs are altered by Sple but not  
239 by Pk. Note that both Sple and Pk can “rescue” the reversed polarity in the P  
240 compartment in a completely broken Ds/Ft system (*ft<sup>-</sup> d<sup>-</sup>*) perhaps through their  
241 effects on the Stan system or, maybe, through other contributors to PCP (**Figures 4, 5**  
242 **and S4**).

243 2. Clones that overexpress *pk* or *sple* in a broken Ds/Ft system. We find that clones of  
244 cells overexpressing *sple* (**Genotype Z**, **Lawrence et al., 2004**) or *pk* (**Genotype 24**; data

245 not shown), have small nonautonomous effects in the wildtype and, more so, in *ds*<sup>-</sup>  
246 flies (Genotype 25 and Genotype 26) in which they polarise receiving cells to point  
247 strongly inwards (Figure 7). Perhaps these clones act via the Stan system? It is  
248 pertinent that cells overexpressing the *pk* gene accumulate Vang uniformly on the cell  
249 membrane (Bastock et al., 2003; Olofsson et al., 2014). If this were to happen in our  
250 experiments, then the clone could behave as if it were overexpressing *Vang* and should  
251 polarise surrounding cells inwards, as observed; this effect should be stronger in *ds*<sup>-</sup>  
252 than in *ds*<sup>+</sup> cells, also as observed. To test this hypothesis further we made *Vang*<sup>-</sup>  
253 clones that overexpressed *pk* (Genotype 27), as well as control *Vang*<sup>-</sup> clones (Genotype  
254 28), in *ds*<sup>-</sup> flies. Both these types of clones behaved like *Vang*<sup>-</sup> clones in wildtype flies  
255 (Genotype 29), and could not be distinguished from each other, ie they polarise *ds*<sup>-</sup>  
256 receiving cells outwards (Figure 7), confirming the hypothesis that cells  
257 overexpressing *pk* polarise cells because they accumulate Vang, a Stan system protein.  
258 Thus, overexpressing Pk interferes with the Stan system. These results show that Pk  
259 and Sple can function independently of the Ds/Ft system.

260 **(v) The Ds/Ft system functions well but abnormally, both in cells that lack Pk**  
261 **and Sple and in cells that have *pk* or *sple* overexpressed**

262 1. In *pk-sple*<sup>-</sup> flies. Clones of cells overexpressing *ft* repolarise receiving cells strongly,  
263 even if they lack Pk and Sple (Genotype 30). However it surprised us that in the  
264 largely reversed A compartment of the *pk-sple*<sup>-</sup> abdomen, the hairs around the clones  
265 point inwards (the opposite sign induced by such clones in the wildtype) and also  
266 inwards in the P compartment (the same sign as in wildtype, Figure 2). Clones  
267 overexpressing *ds* in *pk-sple*<sup>-</sup> flies (Genotype 31) act comparably, the hairs around  
268 such clones point outwards in A (the opposite sign induced by such clones in the  
269 wildtype) and outwards, but weakly, in the P compartment (the same sign as in  
270 wildtype), see Figure S3. Thus in clones of both genotypes, in the A compartments,  
271 the sign of the effect is the opposite from when such clones are made in the wildtype  
272 (Genotype 2 and Genotype 4). Nevertheless, in both these genotypes, in the P  
273 compartments, the sign of the polarising effect is the same as wildtype. Quantitation  
274 confirms these results and shows that clones (in the A compartment) overexpressing  
275 either *ds* or *ft* affect the polarity of both wildtype and *stan*<sup>-</sup> (Genotype 5 and Genotype  
276 3) cells in the same way and both *pk-sple*<sup>-</sup> *stan*<sup>+</sup> and *pk-sple*<sup>-</sup> *stan*<sup>-</sup> (Genotype 32 and  
277 Genotype 33) receiving cells in the opposite way (Figures 3 and S3). Results that  
278 underline again that the Ds/Ft system acts independently of the Stan system. They also  
279 show that Pk and Sple do not act as a functional link between the Ds/Ft system and  
280 the Stan system, because if they were a link, the removal of Pk and Sple would block  
281 effects on polarity caused by *ft*<sup>-</sup> cells.

282 2. In flies in which *pk* or *sple* are overexpressed. Clones that lack *ft* made in flies in  
283 which *pk* is generally overexpressed (Genotype 34) behave as follows: where the  
284 polarity of much of the surrounding background is reversed from normal, with the  
285 hairs pointing forwards (ie in the A compartment), *ft*<sup>-</sup> clones act with the opposite



286 sign to that in the wildtype (**Genotype 35**) and hairs around the clone tend to point  
287 outwards (**Figure 6**). In the P compartment, where overexpression of *pk* produces no  
288 change to polarity, the *ft*<sup>-</sup> clones behave as they do in the wildtype, that is the hairs  
289 point outwards from the clone (**Figure 6**).

290 Clones that lack *ft* made in flies in which *sple* is generally overexpressed  
291 (**Genotype 36**) behave as follows: in the A compartment, which has normal polarity,  
292 these clones affect these receiving cells as they affect wildtype cells; hairs around the  
293 clone point inwards (**Figure 6**). In the P compartment, where the polarity of the  
294 surrounding background is reversed from normal with the hairs pointing forwards,  
295 the *ft*<sup>-</sup> clones now polarise receiving cells with the opposite sign to that in the  
296 wildtype, that is the hairs point inwards into the clone (**Figure 6**).

297 In the A compartment of the abdomen, clones that lack *ds* have effects of the  
298 opposite sign to *ft*<sup>-</sup> clones in both classes (points 1 and 2) of experiments above (as  
299 would be expected). However *ds*<sup>-</sup> clones have little or no effect in the P compartment  
300 in all genotypes tested (data not shown, **Genotype 37**, **Genotype 38** and **Genotype 39**).

301 3. These results show that the Ds/Ft system can function independently of Pk and Sple  
302 but Pk and Sple modulate the sign of its output. This dramatic effect could, in  
303 principle, be due to Pk and/or Sple affecting the pattern of expression of *ds* or *ft* and  
304 changing the orientation of the gradients. To test we studied the expression of  
305 enhancer traps for *ds* and *fj* loci in *pk-sple*<sup>-</sup> flies and saw no departure from the  
306 wildtype patterns (data not shown). It follows that Pk and Sple determine whether  
307 polarised structures in the cell, the hairs and bristles, point up or down the gradients  
308 of Ds and Fj.

## 309 **DISCUSSION**

310 Our aim is to understand the contribution of Pk and Sple to building planar cell  
311 polarity in the wildtype fly. The main results and conclusions are listed below and  
312 several speak against the currently prevailing opinions of the function of the *pk* gene  
313 in PCP. We discuss these issues one by one.

### 314 **The Ds/Ft system and the Stan system are independent**

315 *ft*-overexpressing clones reorient wildtype receiving cells, outwards in the A  
316 compartment (**Casal et al., 2006**) and inwards in the P. These clones have the same  
317 effects on cells in which the Stan system of PCP is broken (for example in *stan*<sup>-</sup> flies;  
318 **Figures 2** and **3**). This result confirms that for both compartments, the Ds/Ft system  
319 acts independently of the Stan system (**Casal et al., 2006; Lawrence et al., 2007;**  
320 **Lawrence, 2011**). Nevertheless, there remains a long-standing conviction held by some  
321 that the Ds/Ft system does not act independently but directs the Stan system, raising  
322 an issue that is still being described as “*unresolved*” (**Matis and Axelrod, 2013**),  
323 “*controversial*” (**Ambegaonkar and Irvine, 2015**) and “*contentious*” (**Butler and**

324 Wallingford, 2017). It has been argued that the combination  $stan^3/stan^{E59}$  used in our  
325 key experiments (Casal et al., 2006) does not break the Stan system (Axelrod, 2009).  
326 However in those experiments, and in the present experiments, we deployed clones  
327 that overexpress *ft* that are also  $stan^{E59}$  homozygous (*stanE59* introduces a premature  
328 stop codon in the ectodomain Usui et al., 1999). Yet these clones, as we pointed out in  
329 2006 (Casal et al., 2006), which incontrovertibly lack any functional Stan protein,  
330 propagate the effects on polarity over several rows of  $stan^3/stan^{E59}$  receiving cells. It  
331 follows that polarisation cannot be due to any intracellular interaction between Stan  
332 and any component of the Ds/Ft system within the sending cells. However it could be  
333 argued that extra Ft in the sending cell, attracting Ds in the receiving cell, would  
334 thereby influence some residual capability of the Stan system in the receiving cells to  
335 receive and propagate polarity to neighbouring cells. Yet, clones that overexpress both  
336 *fz* and *stan* (ie cells that have a fully functional Stan system) fail to repolarise  
337  $stan^3/stan^{E59}$  cells (Casal et al., 2006). Thus the propagation of polarity change  
338 observed around cells that overexpress *ft* cannot be due to any effect on the Stan  
339 system. Similarly, in our present experiments we deploy homozygous  $stan^{E59}$  clones in  
340  $stan^3/stan^{E59}$  flies that are also *pk-sple*<sup>-</sup> homozygotes. When such clones also  
341 overexpress *ft* or *ds* they do repolarise the receiving cells. It follows that the observed  
342 polarisation cannot depend on Pk and Sple intervening between the Ds/Ft and the  
343 Stan systems. A conclusion that conflicts with current models of the *pk* gene (Hogan  
344 et al., 2011; Ayukawa et al., 2014; Merkel et al., 2014; Olofsson et al., 2014;  
345 Ambegaonkar and Irvine, 2015).

### 346 **Pk/Sple act independently of the Stan system**

347 Loss of the *pk* gene or overexpressing the Pk isoform reverses polarity of most of the A  
348 compartment, having strong effects even in flies with a broken Stan system ( $stan^-$ )  
349 Similarly, overexpressing Sple reverses polarity in the P compartment in  $stan^-$  flies; it  
350 follows that Pk and Sple can act independently of the Stan system. These results add to  
351 earlier findings that, in *pk-sple*<sup>-</sup> flies, the mechanisms of propagation due to the Stan  
352 system are preserved and even enhanced, raising doubt about the function of the  
353 asymmetric localisation per se (Adler et al., 2000; Lawrence et al., 2004). Clearly Pk  
354 and Sple do not function simply as elements of the Stan system.

355 Many will find this view heretic, but let us ask why was Pk originally classified as  
356 a core protein? The arguments that connected Pk and Sple to the Stan system were,  
357 firstly that these proteins and others of the Stan system (Fz and Vang) are themselves  
358 asymmetrically localised at the membrane and, secondly, in *pk-sple*<sup>-</sup> flies, the normal  
359 asymmetric localisation of Fz and Vang is not seen (reviewed in Strutt, 2009). Yet, as  
360 we have seen the connection between asymmetric localisation and propagation of  
361 polarity is tenuous; it can still be that this asymmetry is more a consequence than a  
362 cause of polarity. Other results argue that Pk and Sple are not standard members of  
363 the Stan system: the loss of key genes (eg Fz or Stan) in the receiving cells cripples or  
364 eliminates responses to abnormal amounts of other Stan system proteins in the

365 sending cells —yet receiving cells that are *pk-sple*<sup>-</sup> respond at least as well to such  
366 sending cells (Lawrence et al., 2004).

## 367 **Pk and Sple modulate the Ds/Ft system, determining the polarity of its** 368 **output**

369 Sending cells that overexpress *ds* or *ft*, or lack *ds* or *ft*, change the polarity of receiving  
370 cells, even in the absence of Pk and Sple— these proteins cannot be necessary for the  
371 Ds/Ft system to propagate polarity. However the sign of this change depends on  
372 whether the receiving cells contain, lack or overexpress products of the *pk* gene. These  
373 results show that the Pk and Sple can alter the sign of polarisation caused the Ds/Ft  
374 system. Also, the stark finding that clones with altered amounts of Ds or Ft have  
375 strong effects on polarity both in *pk-sple*<sup>-</sup> and in *pk-sple*<sup>-</sup> *stan*<sup>-</sup> flies argues again  
376 against the current view that, in the wildtype, Ds/Ft output goes through Pk/Sple to  
377 the Stan system. Even advocates of this view encounter problems: Ayuwaka and  
378 colleagues have difficulties in demonstrating how Ds/Ft might deploy Pk and Sple to  
379 act on the Stan system : “our experiments do not reveal.. how...polarized Sple  
380 complexes regulate the core proteins” (Ayukawa et al., 2014). Others have difficulties in  
381 understanding what Pk does in the Stan system: “the core function of Pk-Sple is not  
382 well defined” (Olofsson et al., 2014). However if our conclusion that Pk and Sple can  
383 act independently on both the Stan and the Ds/Ft system is correct, then all these  
384 difficulties disappear. A diagram suggesting how the *pk* gene might fit into the  
385 organisation of PCP is given in Figure 8.

## 386 **Some unanswered questions**

387 1. How do Pk and Sple have their effects on polarity? It appears that the sign of  
388 polarisation depends on the relative amounts of Pk and Sple in a particular region of  
389 the fly (Gubb et al., 1999; Ayukawa et al., 2014). One model is that the Ds/Ft proteins  
390 might act through Pk and Sple to bias the orientation of microtubules and they might  
391 transport Stan system components preferentially to one side of the cell (Harumoto et  
392 al., 2010; Matis et al., 2014; Olofsson et al., 2014). But, the correlation between  
393 microtubule orientation and PCP is inconsistent (Harumoto et al., 2010; Sharp and  
394 Axelrod, 2016) and unconvincing: “the inference that Ds/Ft orients PCP in wing by...  
395 microtubules is incorrect” (Ambegaonkar and Irvine, 2015). Also, this model is  
396 contradicted by our results, which show that abnormal amounts of Ds, Ft, Sple or Pk  
397 can all affect PCP even when the Stan system is broken.

398 It has been suggested that Pk and Sple do fundamentally different things  
399 (Ayukawa et al., 2014; Ambegaonkar and Irvine, 2015); however our findings fit better  
400 with the view that the two isoforms have related molecular functions but interact with  
401 the two PCP systems differently (Olofsson et al., 2014). It might appear that Pk can act  
402 in only the A compartment and Sple in the P, but it cannot be so simple, for the  
403 universal expression of Pk can alter the back of the P compartment in *ft*<sup>-</sup> *d*<sup>-</sup> flies  
404 (Figure 4). Also, when *sple* is generally overexpressed in *ft*<sup>-</sup> *d*<sup>-</sup> flies, polarity of the

405 anterior region of the A compartment is considerably altered (Figure 5). In both  
406 compartments the action of Pk appears to be independent of an intact Ds/Ft system,  
407 but the effects of Sple in the P compartment depend on whether the background  
408 genotype is  $d^+$  or  $ft^- d^-$  (Figure S4).

409 2. But why are the Pk and Sple proteins asymmetrically localised in the cell? Part of  
410 the answer could be that Pk and Sple work with and/or bind to components of the  
411 Ds/Ft system which are themselves asymmetrically localised. Indeed, there is already  
412 evidence that Pk and Sple bind to Ds/Ft system components such as D (Ayukawa et  
413 al., 2014) and Ds (Ayukawa et al., 2014; Ambegaonkar and Irvine, 2015). Ayuwaka et  
414 al concluded “*the localization and function of Sple is regulated through its interaction*  
415 *with Ds group proteins*”. But this cannot be all of the answer as Pk is not properly  
416 localised in  $stan^-$  cells (Tree et al., 2002b), in which Ds and Ft are, presumably,  
417 normally localised.

418 3. How can we understand the effect of Pk and Sple on the Stan system, particularly  
419 on range? In the A compartment, a high level of Sple reduces polarity changes  
420 induced by  $fz^-$  clones, while the loss of the  $pk$  gene increases their range. One  
421 explanation could depend on Sple and Pk (or the lack of these proteins) acting on the  
422 Ds/Ft system —if they made the polarity induced by Ds/Ft in the cells more (or less)  
423 robust it would make it more difficult (or easier) for clones affecting the Stan system  
424 to alter PCP. Another explanation could relate to some direct effect of Pk (and Sple)  
425 on Vang (Bastock et al., 2003) which fits our observations with clones overexpressing  
426 Pk (Figure 7). The function of Vang in the Stan system is somewhat unclear; like Pk,  
427 Vang is present in larger than stoichiometric amounts in relation to the main bridge  
428 molecules, Stan and Fz (Strutt et al., 2016), yet affects bridge function (Struhl et al.,  
429 2012). The abdominal phenotypes of  $Vang^-$  and  $pk-sple^-$  are somewhat similar, both  
430 having areas of reversed polarity (Lawrence et al., 2004), suggesting a commonality of  
431 function. Indeed there is a recent model proposing that Pk acts on the stability of Fz  
432 intracellularly (via Dsh) and in the adjacent cell (via Vang); the former effect may  
433 involve endocytosis (Warrington et al., 2017). Our experiments suggest that any  
434 action of Pk might not be limited to the Stan system and include, also, the Ds/Ft  
435 system. In any case we have no explanation for the lack of apparent effects of Pk and  
436 Sple on the range of  $fz^-$  clones in the P compartment.

437 4. What could be the purpose of such complexity? In *Drosophila* the consistent  
438 orientation of the wing hairs may have led to an oversimplified and idealised picture.  
439 Elsewhere, the presentation of PCP is more complex: consider the mixed orientation  
440 of rows of hairs and denticles on the *Drosophila* larva, differing dorsally and ventrally,  
441 or, in mammals, the the startlingly diverse orientation of stereocilia in the vestibular  
442 system, or the complex patterns of hair orientation. Two separate genetic systems each  
443 generating polarity based on morphogen gradients, plus Pk and Sple to modulate  
444 output in different parts of the body, could generate much of this flexibility in PCP.

## 445 Conclusion

446 Our experiments argue that Pk and Sple are not essential components of either the  
447 Ds/Ft or the Stan systems. We have shown that they do not function as a bridge  
448 linking the two systems. Instead, Pk and Sple appear to modulate the polarity outputs  
449 of both the Ds/Ft system and the Stan system. Both these systems are different in their  
450 components but similar in their logic; both utilise intercellular bridges that are  
451 distributed asymmetrically within each cell. Pk and Sple could help produce this  
452 asymmetry— perhaps via a generic function in cell biology whose contribution to  
453 PCP is still undiscovered.

## 454 MATERIALS AND METHODS

### 455 Mutations and transgenes

456 The FlyBase ([Gramates et al., 2017](#)) entries for mutations and transgenes are the  
457 following: *tub.Gal4: Scer\GAL4<sup>alphaTub84B.PL</sup>*. *tub.Gal80: Scer\GAL80<sup>alphaTub84B.P</sup>*.  
458 *UAS.ectoDs: ds<sup>ecto.Scer\UAS</sup>*. *UAS.ft: ft<sup>Scer\UAS.cMa</sup>*. *UAS.fz : fz<sup>Scer\UAS.cSa</sup>*. *UAS.pk: pk<sup>Scer\UAS.cGa</sup>*.  
459 *UAS.sple: pk<sup>sple.Scer\UAS</sup>*. *ck<sup>UAH21</sup>*. *d<sup>GC13</sup>*. *ds<sup>UA071</sup>*. *ft<sup>8</sup>* and *ft<sup>G-rv</sup>*. *fz<sup>15</sup>*. *pk<sup>pk-sple-13</sup>*. *pwn<sup>1</sup>*. *sha<sup>1</sup>*. *stan<sup>3</sup>*  
460 and *stan<sup>E59</sup>*. *trc<sup>1</sup>*.

### 461 Experimental Genotypes

462 **Genotype 1:** *UAS.fz clones in stan<sup>-</sup> flies: y w hs.FLP; FRT42D tub.Gal80 stan<sup>3</sup>*  
463 *hs.CD2, y<sup>+</sup>/ FRT42D pwn stan<sup>E59</sup>; UAS.fz/ tub.Gal4*

464 **Genotype 2:** *UAS.ft clones in wild type flies: y w hs.FLP tub.Gal4 UAS.nls-GFP/ y*  
465 *w hs.FLP; d<sup>GC13</sup> FRT42D pwn sha/ d<sup>GC13</sup> FRT42D tub.Gal80, y<sup>+</sup>; UAS.ft/+*

466 **Genotype 3:** *UAS.ft clones in stan<sup>-</sup> flies: y w hs.FLP; FRT42D pwn stan<sup>E59</sup> sha/*  
467 *FRT42D tub.Gal80 stan<sup>3</sup> hs.CD2, y<sup>+</sup>; UAS.ft/ tub.Gal4*

468 **Genotype 4:** *UAS.ectoDs clones in wild type flies: y w hs.FLP tub.Gal4 UAS.nls-*  
469 *GFP/ y w hs.FLP; FRT42D pwn stan<sup>E59</sup> sha/ FRT42D tub.Gal80; UAS.ectoDs/ +*

470 **Genotype 5:** *UAS.ectoDs clones in stan<sup>-</sup> flies: y w hs.FLP; FRT42D pwn stan<sup>E59</sup> sha/*  
471 *FRT42D tub.Gal80 stan<sup>3</sup> hs.CD2y<sup>+</sup>; UAS.ectoDs/ tub.Gal4*

472 **Genotype 6:** *UAS.fz clones in wild type flies: y w hs.FLP; FRT42D pwn/ FRT42D*  
473 *tub.G80, y<sup>+</sup>; tub.Gal4/ UAS.fz*

474 **Genotype 7:** *UAS.fz clones in ds<sup>-</sup> flies: y w hs.FLP tub.Gal4 UAS.nls-GFP/ y w*  
475 *hs.FLP; ds<sup>UA071</sup> FRT42D pwn/ ds<sup>UA071</sup> FRT42D tub.Gal80; UAS.fz hs.CD2, y<sup>+</sup>/ +*

476 **Genotype 8:** *ds<sup>-</sup> pk<sup>-</sup> sple<sup>-</sup> flies: y w hs.FLP; ds<sup>UA071</sup> pk<sup>pk-sple-13</sup>; UAS.sple/ TM2*

477 **Genotype 9:** *pk<sup>-</sup> sple<sup>-</sup> flies: pk<sup>pk-sple-13</sup>*

- 478 **Genotype 10:** *UAS.fz clones in pk<sup>-</sup>sple<sup>-</sup> flies:* *y w hs.FLP tub.Gal4 UAS.nls-GFP/ y w*  
479 *hs.FLP; FRT42D pk<sup>pk-sple-13</sup> sha/ FRT42D pk<sup>pk-sple-13</sup> tub.Gal80; UAS.fz fz<sup>15</sup> fz2<sup>C1</sup> FRT2A/ +*
- 480 **Genotype 11:** *fz clones in pk<sup>-</sup>sple<sup>-</sup> flies:* *y w hs.FLP122; FRT42 pk<sup>pk-sple-13</sup>/ CyO;*  
481 *fz[P21] trc FRT2A/ tub.Gal80 FRT2A*
- 482 **Genotype 12:** *fz clones in tub.Gal4 UAS.sple flies:* *y w hs.FLP tub.Gal4 UAS.nls-*  
483 *GFP/ w; UAS.sple/ +; UAS.sple; fz<sup>15</sup> trc<sup>C1</sup> FRT2A / hs.GFPw<sup>+</sup> hs.CD2, y<sup>+</sup> ri FRT2A*
- 484 **Genotype 13:** *fz clones in tub.Gal4 UAS.pk flies:* *y w hs.FLP tub.Gal4 UAS.nls-GFP/*  
485 *w; UAS.pk/ +; UAS.sple; fz<sup>15</sup> trc<sup>C1</sup> FRT2A / hs.GFPw<sup>+</sup> hs.CD2, y<sup>+</sup> ri FRT2A*
- 486 **Genotype 14:** *fz clones in ds<sup>-</sup> flies:* *ds<sup>UA071</sup> FRT39/ ds<sup>33k</sup> bw<sup>V1</sup>; fz<sup>H51</sup> trc<sup>C1</sup> ri FRT2A/*  
487 *hs.CD2, y<sup>+</sup> hs.GFP ri FRT2A/ TM3*
- 488 **Genotype 15:** *stan tub.Gal4 UAS.pk flies:* *y w hs.FLP tub.Gal4 UAS.nls-GFP/ y w*  
489 *hs.FLP; FRT42D pwn stan<sup>E59</sup> sha/ FRT42D stan<sup>3</sup>; UAS.pk/ TM2*
- 490 **Genotype 16:** *stan tub.Gal4 UAS.sple flies:* *y w hs.FLP tub.Gal4 UAS.nls-GFP/ y w*  
491 *hs.FLP; FRT42D pwn stan<sup>E59</sup> sha/ FRT42D stan<sup>3</sup>; UAS.sple/ TM2*
- 492 **Genotype 17:** *ds pk<sup>-</sup>sple<sup>-</sup> tub.Gal4 UAS.pk flies:* *y w hs.FLP tub.Gal4 UAS.nls-GFP/ y*  
493 *w hs.FLP; ds<sup>UA071</sup> pk<sup>pk-sple-13</sup>; UAS.pk/ TM2*
- 494 **Genotype 18:** *d tub.Gal4 UAS.pk flies:* *y w hs.FLP tub.Gal4 UAS.nls-GFP/ y w*  
495 *hs.FLP; d<sup>GC13</sup> pr cn/ ft<sup>G-rv</sup> d<sup>GC13</sup> FRT40; UAS.pk/ +*
- 496 **Genotype 19:** *ft d tub.Gal4 UAS.pk flies:* *y w hs.FLP tub.Gal4 UAS.nls-GFP/ y w*  
497 *hs.FLP; ft<sup>8</sup> d<sup>GC13</sup> FRT40A/ ft<sup>G-rv</sup> d<sup>GC13</sup> FRT40A; UAS.sple/ +*
- 498 **Genotype 20:** *ds pk<sup>-</sup>sple<sup>-</sup> tub.Gal4 UAS.sple flies:* *y w hs.FLP tub.Gal4 UAS.nls-GFP/*  
499 *y w hs.FLP; ds<sup>UA071</sup> pk<sup>pk-sple-13</sup>; UAS.sple/ TM2*
- 500 **Genotype 21:** *d tub.Gal4 UAS.sple flies:* *y w hs.FLP tub.Gal4 UAS.nls-GFP/ w; ft<sup>G-rv</sup>*  
501 *d<sup>GC13</sup>/ d<sup>GC13</sup> pr cn; UAS.sple/ +*
- 502 **Genotype 22:** *ft d tub.Gal4 UAS.sple flies:* *y w hs.FLP tub.Gal4 UAS.nls-GFP/ y w*  
503 *hs.FLP; ft<sup>8</sup> d<sup>GC13</sup> FRT40A/ ft<sup>G-rv</sup> d<sup>GC13</sup> FRT40A; UAS.sple/ +*
- 504 **Genotype 23:** *UAS.sple clones in wild type flies:* *y w hs.FLP tub.Gal4 UAS.nls-GFP/*  
505 *y w hs.FLP; FRT42D pwn/ FRT42D tub.Gal80; UAS.sple/ +*
- 506 **Genotype 24:** *UAS.pk clones in wild type flies:* *y w hs.FLP tub.Gal4 UAS.nls-GFP/ y w*  
507 *hs.FLP; FRT42D pwn/ FRT42D tub.Gal80; UAS.pk/ +*
- 508 **Genotype 25:** *UAS.sple clones in ds<sup>-</sup> flies:* *y w hs.FLP tub.Gal4 UAS.nls-GFP/ y w*  
509 *hs.FLP; ds<sup>UA071</sup> ck<sup>UAh21</sup> FRT40A/ ds<sup>UA071</sup> tub.Gal80 FRT40A; UAS.sple/ MRS*

- 510 **Genotype 26: UAS.pk clones in *ds<sup>-</sup>* flies:** *y w hs.FLP tub.Gal4 UAS.nls-GFP/ y w*  
511 *hs.FLP; ds<sup>UA071</sup> ck<sup>UAh21</sup> FRT40A/ ds<sup>UA071</sup> tub.Gal80 FRT40A; UAS.pk/ MRS*
- 512 **Genotype 27: Vang<sup>-</sup> UAS.pk clones in *ds<sup>-</sup>* flies:** *y w hs.FLP tub.Gal4 UAS.nls-GFP/ y*  
513 *w hs.FLP; ds<sup>UA071</sup> FRT42D tub.Gal80/ ds<sup>UA071</sup> hs.CD2, y<sup>+</sup> FRT42D pwn Vang<sup>stbm-6</sup> sha;*  
514 *UAS.pk/ +*
- 515 **Genotype 28: Vang<sup>-</sup> clones in *ds<sup>-</sup>* flies:** *y w hs.FLP; ds<sup>UA071</sup> FRT42D tub.Gal80/ ds<sup>UA071</sup>*  
516 *hs.CD2, y<sup>+</sup> FRT42D pwn Vang<sup>stbm-6</sup> sha; UAS.pk/ +*
- 517 **Genotype 29: Vang<sup>-</sup> clones:** *y/ y hs.FLP; FRT42D pwn Vang<sup>stbm-6</sup> FRT42D hs.CD2, y<sup>+</sup>*
- 518 **Genotype 30: UAS.ft clones in *pk<sup>-</sup>sple<sup>-</sup>* flies:** *y w hs.FLP122 tub.gal4 UAS.nls-GFP/ y*  
519 *w hs.FLP; FRT42D pk<sup>pk-sple-13</sup> sha/ FRT42 pk<sup>pk-sple-13</sup> tub.Gal80/ UAS.ft/ +*
- 520 **Genotype 31: UAS.ectoDs clones in *pk<sup>-</sup>sple<sup>-</sup>* flies:** *y w hs.FLP122 tub.gal4 UAS.nls-*  
521 *GFP/ y w hs.FLP; FRT42D pk<sup>pk-sple-13</sup> sha/ FRT42 pk<sup>pk-sple-13</sup> tub.Gal80/ UAS.ectoDs/ +*
- 522 **Genotype 32: UAS.ectoDs clones in *pk<sup>-</sup>sple<sup>-</sup> stan<sup>-</sup>* flies:** *y w hs.FLP tub.Gal4 UAS.nls-*  
523 *GFP/ y w hs.FLP; FRT42D pk<sup>pk-sple-13</sup> stan<sup>3</sup> tub.Gal80, y<sup>+</sup>/ FRT42 pk<sup>pk-sple-13</sup> stan<sup>E59</sup> sha ;*  
524 *UAS.ectoDs/ +*
- 525 **Genotype 33: UAS.ft clones in *pk<sup>-</sup>sple<sup>-</sup> stan<sup>-</sup>* flies:** *y w hs.FLP tub.Gal4 UAS.nls-GFP/*  
526 *y w hs.FLP122; FRT42D pk<sup>pk-sple-13</sup> stan<sup>3</sup> tub.Gal80, y<sup>+</sup>/ FRT42D pk<sup>pk-sple-13</sup> stan<sup>E59</sup> sha ;*  
527 *UAS.ft/ +*
- 528 **Genotype 34: ft<sup>-</sup> clones in *tub.Gal4 UAS.pk* flies:** *y w hs.FLP tub.Gal4 UAS.GFP-nls/*  
529 *y; ft<sup>15</sup> stc FRT39/ FRT39; UAS.pk/ +*
- 530 **Genotype 35: ft<sup>-</sup> clones:** *y w hs.FLP; ft<sup>15</sup> stc FRT39/ FRT39*
- 531 **Genotype 36: ft<sup>-</sup> clones in *tub.Gal4 UAS.sple* flies:** *y w hs.FLP tub.Gal4 UAS.GFP-*  
532 *nls/ y; ft<sup>15</sup> stc FRT39/ FRT39; UAS.sple/ +*
- 533 **Genotype 37: ds<sup>-</sup> clones in *tub.Gal4 UAS.sple* flies:** *w hs.FLP tub.Gal4 UAS.nls-GFP;*  
534 *ds<sup>UA071</sup> ck<sup>UAh21</sup> FRT40A/ FRT40A; UAS.sple/ +*
- 535 **Genotype 38: ds<sup>-</sup> clones in *tub.Gal4 UAS.pk* flies:** *w hs.FLP tub.Gal4 UAS.nls-GFP;*  
536 *ds<sup>UA071</sup> ck<sup>UAh21</sup> FRT40A/ FRT40A; UAS.pk/ +*
- 537 **Genotype 39: ds<sup>-</sup> clones:** *y w hs.FLP/ +; ds<sup>UA071</sup> ck<sup>UAh21</sup> FRT40A/ Dp(1;2)sc<sup>19</sup> w<sup>+30c</sup>*  
538 *FRT40A*
- 539 **Genotype 40: Control clones in *pk<sup>-</sup>sple<sup>-</sup> stan<sup>-</sup>* flies:** *y w hs.FLP tub.Gal4 UAS.nls-*  
540 *GFP/ y w hs.FLP; FRT42D pk<sup>pk-sple-13</sup> stan<sup>E59</sup> sha/ FRT42Dpk<sup>pk-sple-13</sup> stan<sup>3</sup> tub.Gal80, y<sup>+</sup>;*  
541 *MRS/ +*
- 542 **Genotype 41: stan<sup>-</sup> flies:** *y w hs.FLP; FRT42D pwn stan<sup>E59</sup> sha/ FRT42D stan<sup>3</sup>;*  
543 *UAS.sple/ +*

## 544 **Clone induction and microscopy**

545 Clones were induced by heat shocking third instar larvae for 1 hr at 34°C. Adult  
546 abdominal cuticles were studied as before (e.g., [Lawrence et al., 2004](#); [Casal et al.,](#)  
547 [2006](#)).

## 548 **Quantitation**

549 Individual hairs along the entire perimeter of each clone (about 60-100 hairs per  
550 clone) were each scored as pointing largely into, outwards or parallel to the clone.  
551 Parallel hairs, which averaged 8% of the hairs, were counted; half was added equally to  
552 the inwards and outwards sets. The average orientation is then found for each clone  
553 (between 10 and 20 clones per genotype).

554 For range measurements, for each clone (n=20) the maximum extent in cell rows of  
555 the induced polarity changes was measured. The observer was blinded as to  
556 genotypes; he chose clones located in the middle of the A compartment and the  
557 middle or rear of the hairy region of the P compartment; small clones were avoided.  
558 Statistical analysis and graphics were performed in R using standard packages ([R Core](#)  
559 [Team, 2016](#)) and the *reshape* and *ggplot* packages ([Wickham, 2007, 2009](#)).

## 560 **ACKNOWLEDGEMENTS**

561 We thank the Department of Zoology, the Wellcome (WT096645MA and  
562 WT107060MA) for generous support, Malcolm Burrows for encouragement, and  
563 Gary Struhl and David Strutt for stocks and constructive criticisms.

## 564 **REFERENCES**

- 565 Adler, P.N., Taylor, J., and Charlton, J. (2000). The domineering non-autonomy of  
566 *frizzled* and *van Gogh* clones in the *Drosophila* wing is a consequence of a disruption  
567 in local signaling. *Mech. Dev.* 96, 197-207.
- 568 Ambegaonkar, A.A., and Irvine, K.D. (2015). Coordination of planar cell polarity  
569 pathways through Spiny-legs. *eLife* 4.
- 570 Ambegaonkar, A.A., Pan, G., Mani, M., Feng, Y., and Irvine, K.D. (2012). Propagation  
571 of Dachsous-Fat planar cell polarity. *Curr. Biol.* 22, 1302-1308.
- 572 Axelrod, J.D. (2009). Progress and challenges in understanding planar cell polarity  
573 signaling. *Semin. Cell Dev. Biol.* 20, 964-971.
- 574 Ayukawa, T., Akiyama, M., Mummery-Widmer, J.L., Stoeger, T., Sasaki, J., Knoblich,  
575 J.A., Senoo, H., Sasaki, T., and Yamazaki, M. (2014). Dachsous-dependent asymmetric  
576 localization of spiny-legs determines planar cell polarity orientation in *Drosophila*.  
577 *Cell Rep.* 8, 610-621.



- 578 Bastock, R., Strutt, H., and Strutt, D. (2003). Strabismus is asymmetrically localised  
579 and binds to Prickle and Dishevelled during *Drosophila* planar polarity patterning.  
580 *Development* 130, 3007-3014.
- 581 Brittle, A.L., Thomas, C., and Strutt, D. (2012). Planar polarity specification through  
582 asymmetric subcellular localization of Fat and Dachshous. *Curr. Biol.* 22, 907-914.
- 583 Butler, M.T., and Wallingford, J.B. (2017). Planar cell polarity in development and  
584 disease. *Nat. Rev. Mol. Cell Biol.* 18, 375-388.
- 585 Casal, J., Lawrence, P.A., and Struhl, G. (2006). Two separate molecular systems,  
586 Dachshous/Fat and Starry night/Frizzled, act independently to confer planar cell  
587 polarity. *Development* 133, 4561-4572.
- 588 Casal, J., Struhl, G., and Lawrence, P.A. (2002). Developmental compartments and  
589 planar polarity in *Drosophila*. *Curr. Biol.* 12, 1189-1198.
- 590 Goodrich, L.V., and Strutt, D. (2011). Principles of planar polarity in animal  
591 development. *Development* 138, 1877-1892.
- 592 Gramates, L., Marygold, S., dos Santos, G., Urbano, J.-M., Antonazzo, G., Matthews,  
593 B., Rey, A., Tabone, C., Crosby, M., Emmert, D., *et al.* (2017). FlyBase at 25: looking to  
594 the future. *Nucleic Acids Res.* 45, D663-D671.
- 595 Gubb, D., and Garcia-Bellido, A. (1982). A genetic analysis of the determination of  
596 cuticular polarity during development in *Drosophila melanogaster*. *J. Embryol. Exp.*  
597 *Morph.* 68, 37-57.
- 598 Gubb, D., Green, C., Huen, D., Coulson, D., Johnson, G., Tree, D., Collier, S., and  
599 Roote, J. (1999). The balance between isoforms of the prickle LIM domain protein is  
600 critical for planar polarity in *Drosophila* imaginal discs. *Genes Dev.* 13, 2315-2327.
- 601 Harumoto, T., Ito, M., Shimada, Y., Kobayashi, T.J., Ueda, H.R., Lu, B., and Uemura,  
602 T. (2010). Atypical cadherins Dachshous and Fat control dynamics of noncentrosomal  
603 microtubules in planar cell polarity. *Dev. Cell* 19, 389-401.
- 604 Hogan, J., Valentine, M., Cox, C., Doyle, K., and Collier, S. (2011). Two *frizzled* planar  
605 cell polarity signals in the *Drosophila* wing are differentially organized by the  
606 *fat/dachshous* pathway. *PLoS Genet* 7, e1001305.
- 607 Ives, P. (1947). [New mutants report.]. *Drosophila Information Service* 21, 68-69.
- 608 Lawrence, P.A. (2011). Planar cell polarity Fashioning solutions. *Fly* 5, 126-128.
- 609 Lawrence, P.A., and Casal, J. (2013). The mechanisms of planar cell polarity, growth  
610 and the Hippo pathway: Some known unknowns. *Dev. Biol.* 377, 1-8.
- 611 Lawrence, P.A., Casal, J., and Struhl, G. (2004). Cell interactions and planar polarity in  
612 the abdominal epidermis of *Drosophila*. *Development* 131, 4651-4664.
- 613 Lawrence, P.A., Struhl, G., and Casal, J. (2007). Planar cell polarity: one or two  
614 pathways? *Nature Reviews. Genetics* 8, 555-563.
- 615 Ma, D., Yang, C.H., McNeill, H., Simon, M.A., and Axelrod, J.D. (2003). Fidelity in  
616 planar cell polarity signalling. *Nature* 421, 543-547.
- 617 Matis, M., and Axelrod, J.D. (2013). Regulation of PCP by the Fat signaling pathway.  
618 *Genes Dev.* 27, 2207-2220.

- 619 Matis, M., Russler-Germain, D.A., Hu, Q., Tomlin, C.J., and Axelrod, J.D. (2014).  
620 Microtubules provide directional information for core PCP function. *eLife* 3.
- 621 Merkel, M., Sagner, A., Gruber, F.S., Etournay, R., Blasse, C., Myers, E., Eaton, S., and  
622 Julicher, F. (2014). The balance of prickle/spiny-legs isoforms controls the amount of  
623 coupling between core and *fat* PCP systems. *Curr. Biol.* 24, 2111-2123.
- 624 Olofsson, J., Sharp, K.A., Matis, M., Cho, B., and Axelrod, J.D. (2014). Prickle/spiny-  
625 legs isoforms control the polarity of the apical microtubule network in planar cell  
626 polarity. *Development* 141, 2866-2874.
- 627 Pan, G., Feng, Y., Ambegaonkar, A.A., Sun, G., Huff, M., Rauskolb, C., and Irvine,  
628 K.D. (2013). Signal transduction by the Fat cytoplasmic domain. *Development* 140,  
629 831-842.
- 630 R Core Team (2016). R: A Language and Environment for Statistical Computing  
631 (Vienna, Austria.: R Foundation for Statistical Computing).
- 632 Sharp, K.A., and Axelrod, J.D. (2016). Prickle isoforms control the direction of tissue  
633 polarity by microtubule independent and dependent mechanisms. *Biol Open* 5, 229-  
634 236.
- 635 Struhl, G., Casal, J., and Lawrence, P.A. (2012). Dissecting the molecular bridges that  
636 mediate the function of Frizzled in planar cell polarity. *Development* 139, 3665-3674.
- 637 Strutt, D. (2009). Gradients and the specification of planar polarity in the insect  
638 cuticle. *Cold Spring Harb Perspect Biol* 1, a000489.
- 639 Strutt, D., and Strutt, H. (2007). Differential activities of the core planar polarity  
640 proteins during *Drosophila* wing patterning. *Dev. Biol.* 302, 181-194.
- 641 Strutt, D.I. (2001). Asymmetric localization of Frizzled and the establishment of cell  
642 polarity in the *Drosophila* wing. *Mol. Cell* 7, 367-375.
- 643 Strutt, H., Gamage, J., and Strutt, D. (2016). Robust asymmetric localization of planar  
644 polarity proteins is associated with organization into signalosome-like domains of  
645 variable stoichiometry. *Cell Rep.* 17, 2660-2671.
- 646 Strutt, H., and Strutt, D. (2008). Differential stability of flamingo protein complexes  
647 underlies the establishment of planar polarity. *Curr. Biol.* 18, 1555-1564.
- 648 Strutt, H., and Strutt, D. (2009). Asymmetric localisation of planar polarity proteins:  
649 Mechanisms and consequences. *Semin. Cell Dev. Biol.* 20, 957-963.
- 650 Tissir, F., and Goffinet, A.M. (2013). Shaping the nervous system: role of the core  
651 planar cell polarity genes. *Nat. Rev. Neurosci.* 14, 525-535.
- 652 Tree, D.R., Ma, D., and Axelrod, J.D. (2002a). A three-tiered mechanism for  
653 regulation of planar cell polarity. *Semin. Cell Dev. Biol.* 13, 217-224.
- 654 Tree, D.R., Shulman, J.M., Rousset, R., Scott, M.P., Gubb, D., and Axelrod, J.D.  
655 (2002b). Prickle mediates feedback amplification to generate asymmetric planar cell  
656 polarity signaling. *Cell* 109, 371-381.
- 657 Usui, T., Shima, Y., Shimada, Y., Hirano, S., Burgess, R.W., Schwarz, T.L., Takeichi,  
658 M., and Uemura, T. (1999). Flamingo, a seven-pass transmembrane cadherin,  
659 regulates planar cell polarity under the control of Frizzled. *Cell* 98, 585-595.

- 660 Wang, Y., and Nathans, J. (2007). Tissue/planar cell polarity in vertebrates: new  
661 insights and new questions. *Development* 134, 647-658.
- 662 Warrington, S.J., Strutt, H., Fisher, K.H., and Strutt, D. (2017). A dual function for  
663 prickle in regulating Frizzled stability during feedback-dependent amplification of  
664 planar polarity. *Curr. Biol.* 27, 2784-2797.
- 665 Wickham, H. (2007). Reshaping Data with the reshape Package. *J. Stat. Softw.* 21, 1--  
666 20.
- 667 Wickham, H. (2009). *ggplot2: Elegant Graphics for Data Analysis* (Springer-Verlag  
668 New York).
- 669 Yang, C., Axelrod, J.D., and Simon, M.A. (2002). Regulation of Frizzled by Fat-like  
670 cadherins during planar polarity signaling in the *Drosophila* compound eye. *Cell* 108,  
671 675-688.
- 672

## 673 **FIGURE LEGENDS**

674 **Figure 1.** A baedeker of the experiments.

675 A summary of all experiments showing the polarities of hairs in the two abdominal  
676 compartments plus the effects of clones on polarity. UAS indicates overexpression of  
677 the said gene in the clones, tub.Gal4 UAS.x indicates generalised expression of x.

678 **Figure 2.** Clones that overexpress *ft* in various backgrounds.

679 The receiving cells point outwards in the A compartments (A-B), inwards in P  
680 compartments (D-E) of *stan*<sup>-</sup> and wildtype cells. The response of *pk-sple*<sup>-</sup> cells is  
681 inwards in both the A and P compartments (C,F). For all figures, clones are outlined  
682 in red dots, blue boxes delimit the areas detailed at higher magnification, blue arrows  
683 indicate orientation of hairs. For images of clones expressing *fz* in the same  
684 backgrounds, see [Figure S2](#).

685 **Figure 3.** Effects of the *ft*-overexpressing clones in A and P compartments (cf [Figure](#)  
686 [2](#)).

687 The orientations of hairs immediately adjacent to each clone are counted and  
688 displayed in box plots, each dot represents the data from one clone. The responses  
689 range from all pointing inwards (top of the graph) to all pointing outwards (bottom).  
690 Breaking the Stan system (*stan*<sup>-</sup>) did not much affect any outcome, confirming that  
691 the Ft/Ds system does not act through the Stan system. However removing *pk* and *sple*  
692 changed the sign of response in the A compartment. (Control clones [Genotype 40](#)).

693 **Figure 4.** Effects of overexpressing *pk* on polarity of cells in which either the Stan  
694 system (*stan*<sup>-</sup>) or the Ds/Ft system is broken (*ft*<sup>-</sup> *d*<sup>-</sup>).

695 Background phenotypes (**B-D**). In the A compartments, generalised overexpression of  
696 *pk* changes the polarity of the anterior region of wildtype, *stan*<sup>-</sup> ([Genotype 41](#)) and *ft*<sup>-</sup>  
697 *d*<sup>-</sup> cells (**A, E and F**). In the P compartments, the region that normally points  
698 anteriorly in *ft*<sup>-</sup> *d*<sup>-</sup> points posteriorly (as in the wildtype) when *pk* is overexpressed  
699 (**G**). Compare [Figure S4](#) for expression of *pk* in *d*<sup>-</sup> flies.

700 **Figure 5.** Effects of overexpressing *sple* on polarity of cells in which either the Stan  
701 system (*stan*<sup>-</sup>) or the Ds/Ft system is broken (*ft*<sup>-</sup> *d*<sup>-</sup>).

702 Overexpression of *sple* in *stan*<sup>-</sup> and the wildtype reverses all or most of the P  
703 compartment to point forwards (**A and E**) but overexpression of *sple* in a *ft*<sup>-</sup> *d*<sup>-</sup>  
704 background produces a P compartment of normal polarity (**G**) and even the rear of  
705 the P region, which points forward in *ft*<sup>-</sup> *d*<sup>-</sup> (**D**) is now “rescued” to normal polarity.  
706 Overexpression of *sple* in *ft*<sup>-</sup> *d*<sup>-</sup> flies also alters the polarity at the front of the A  
707 compartment (**C and F**) turning the hairs laterally, while overexpressing *pk* turns the  
708 hairs to point anteriorly ([Figure 4](#)). Compare [Figure S4](#) for expression of *sple* in *d*<sup>-</sup> flies

709 **Figure 6.** Behaviour of *fz*<sup>-</sup> and *ft*<sup>-</sup> clones in flies overexpressing isoforms of the *pk* gene.  
710 *fz*<sup>-</sup> clones behave normally, polarising receiving cells inwards in both A and P either in  
711 *tub.Gal4 UAS.pk* or *tub.Gal4 UAS.sple* flies, independently of the polarity of their

712 surrounds (A and B). The effects of *ft*<sup>-</sup> clones, but only in territories with reversed  
713 polarity, are the opposite of normal: in the wildtype these effects are inwards in A,  
714 outwards in P while in *tub.Gal4 UAS.pk* the cells close to the anterior clones point  
715 outwards (C) and in *tub.Gal4 UAS.sple* the cells nearby the posterior clones point  
716 inwards (D). See [Figure S5](#) for analysis of maximum range of effects of *fz*<sup>-</sup> clones.

717 [Figure 7](#). Effects of *pk*-expressing clones in flies broken for the Ds/Ft system.  
718 Clones that overexpress *pk* polarise *ds*<sup>-</sup> cells strongly inwards (A). Clones lacking  
719 *Vang* (B) as well as clones that, lacking *Vang*, also overexpress *pk* (C), polarise *ds*<sup>-</sup>  
720 receiving cells strongly outwards.

721 [Figure 8](#). Pk and Sple functions in the context of PCP.  
722 PCP depends on molecular bridges between cells: for the Stan system the key bridge  
723 consists of a complex of Stan and Fz in one cell and Stan in the other; Vang promotes  
724 function of the Stan pillar of this bridge ([Struhl et al., 2012](#)). For the Ds/Ft system, Ds  
725 in one cell is linked to Ft in another, the activity of both is modulated by Fj ([reviewed  
726 in Butler and Wallingford, 2017](#)). Pk and/or Sple bind to Vang and promote  
727 asymmetrical distribution of Vang and other PCP molecules. Yet in the absence of Pk  
728 and Sple, the Stan system can still receive and send polarity information, implying that  
729 it is the asymmetric activation of protein complexes that polarise a cell rather than  
730 asymmetric localisation. Pk and Sple alter the sign of the polarity output of the Ds/Ft  
731 system, but by an unknown mechanism. Yet, Pk and Sple can alter polarity output  
732 even when the Ds/Ft system is broken. The results show that Pk and Sple can act  
733 separately on both systems, implying some general function of Pk and Sple in cell  
734 polarity. The indispensable elements of the two systems are shown in bold.

735

736

## 737 SUPPLEMENTARY FIGURE LEGENDS

738 **Figure S1.** *fz*-overexpressing clone in the P compartment of a *ds*<sup>-</sup> fly.

739 Hairs point outwards from the clone with range of 2-7 cells. Cells of the clone are  
740 marked with *pawn*, and outlined in red dots. Blue arrows indicate orientation of hairs.

741 **Figure S2.** The effects of *fz*-overexpressing clones on various genetic backgrounds in  
742 the A and P compartments —compare with **Figure 2**.

743 The clones polarise responding wildtype cells outwards in both compartments (**A** and  
744 **B**). This effect is blocked when the Stan system is broken (*stan*<sup>-</sup>) (**C** and **D**). In a *pk*-  
745 *sple*<sup>-</sup> background the sign is also outwards but the range of repolarisation is strongly  
746 reduced in the A compartment. Clones are variously marked, see Genotypes in  
747 **Materials and Methods**.

748 **Figure S3.** Results of similar experiments to those in **Figure 3**, but here the clones were  
749 overexpressing the ectodomain of Ds.

750 The results are comparable with those of **Figure 3** in the A compartments (although of  
751 the opposite sign to *ft*-overexpressing clones, as expected (**Casal et al., 2006**). None of  
752 the clones had significant effects in the P compartment — this lack of response is most  
753 simply explained by high ambient level of Ds in P, which is suggested by *ds.LacZ*  
754 expression (**Casal et al., 2002**). A response was visible in flies that lack *four-jointed* (*fj*)  
755 (data not shown), which increases the range of signalling by the Ds/Ft system (**Casal et**  
756 **al., 2006**). One-way Anova with post-hoc Tukey HSD analysis showing levels of  
757 significance for **Figure 3** and **S3**, below (vertical lines are the 95% confidence  
758 intervals).

759 **Figure S4.** The effects of overexpression of *pk* and *sple* in *d*<sup>-</sup> flies.

760 In this background the effects of extra Pk are as in *ft* *d*<sup>-</sup> flies: the anterior part of the A  
761 compartment points forward and the polarity of the P compartment is “rescued”  
762 (compare **C** and **D** with **A** and **B**; see **Figure 4**). However extra Sple increases the area  
763 of anteriorwards polarity in the P compartment (compare **E** with **B**; see **Figure 5**).

764 **Figure S5.** Range measurements for *fz*-expressing clones in wildtype and flies with a  
765 broken Ds/Ft system (*ds*<sup>-</sup>).

766 For each clonal perimeter the maximum number of cell rows showing an induced  
767 polarity change was measured. Below are the results of one-way Anova with post-hoc  
768 Tukey HSD analysis.

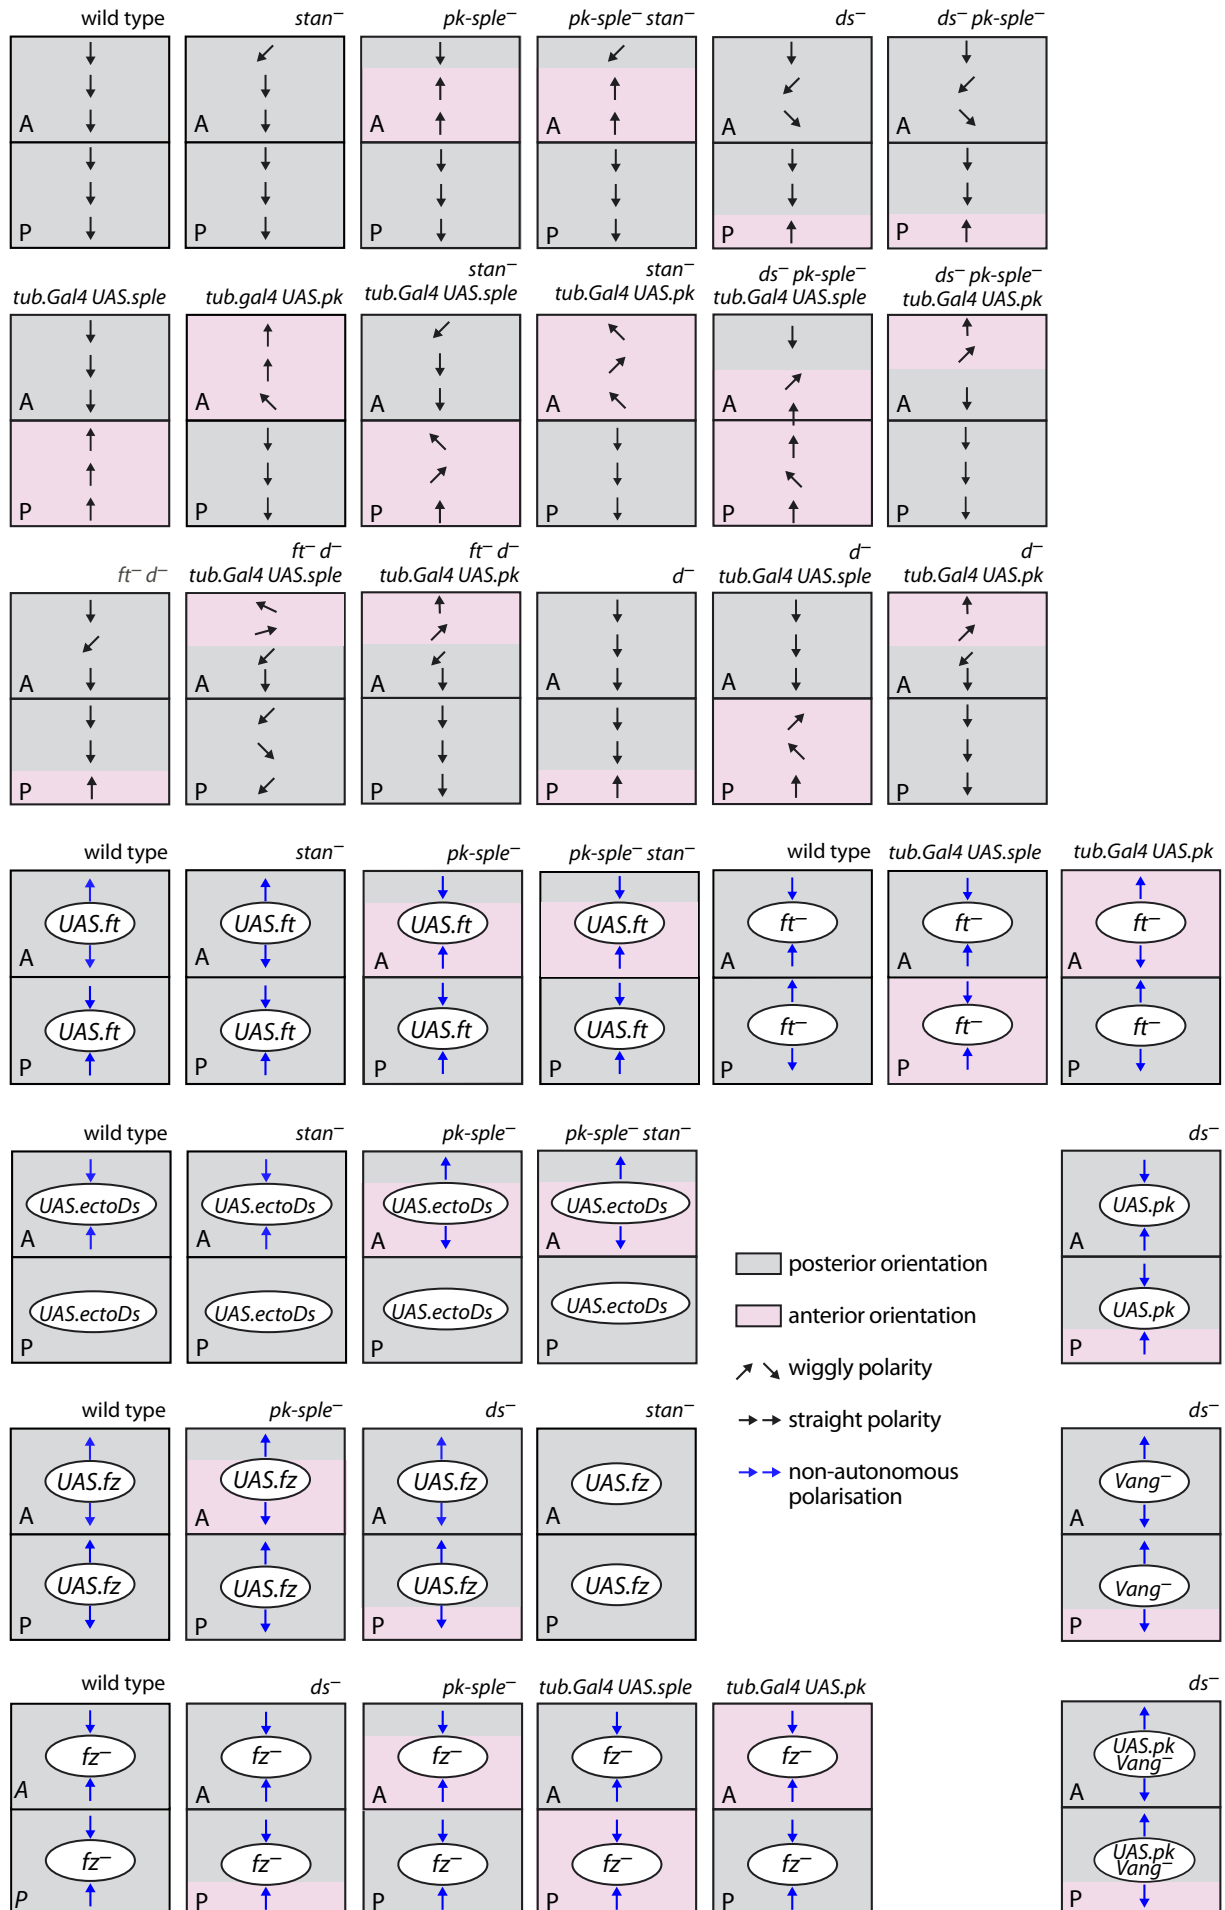

figure 1

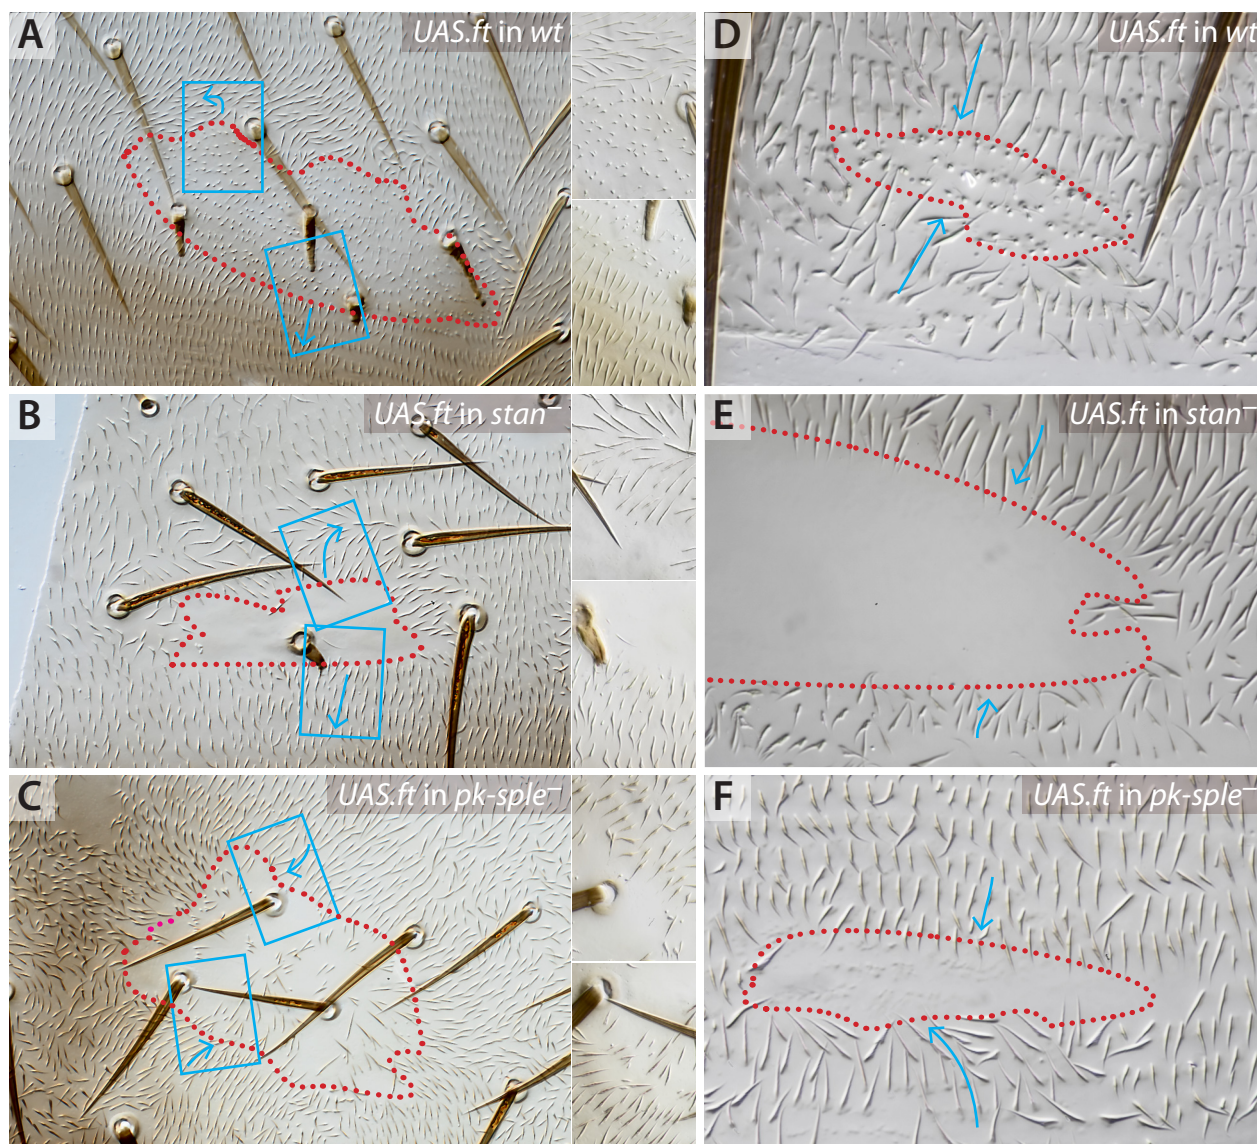

figure 2



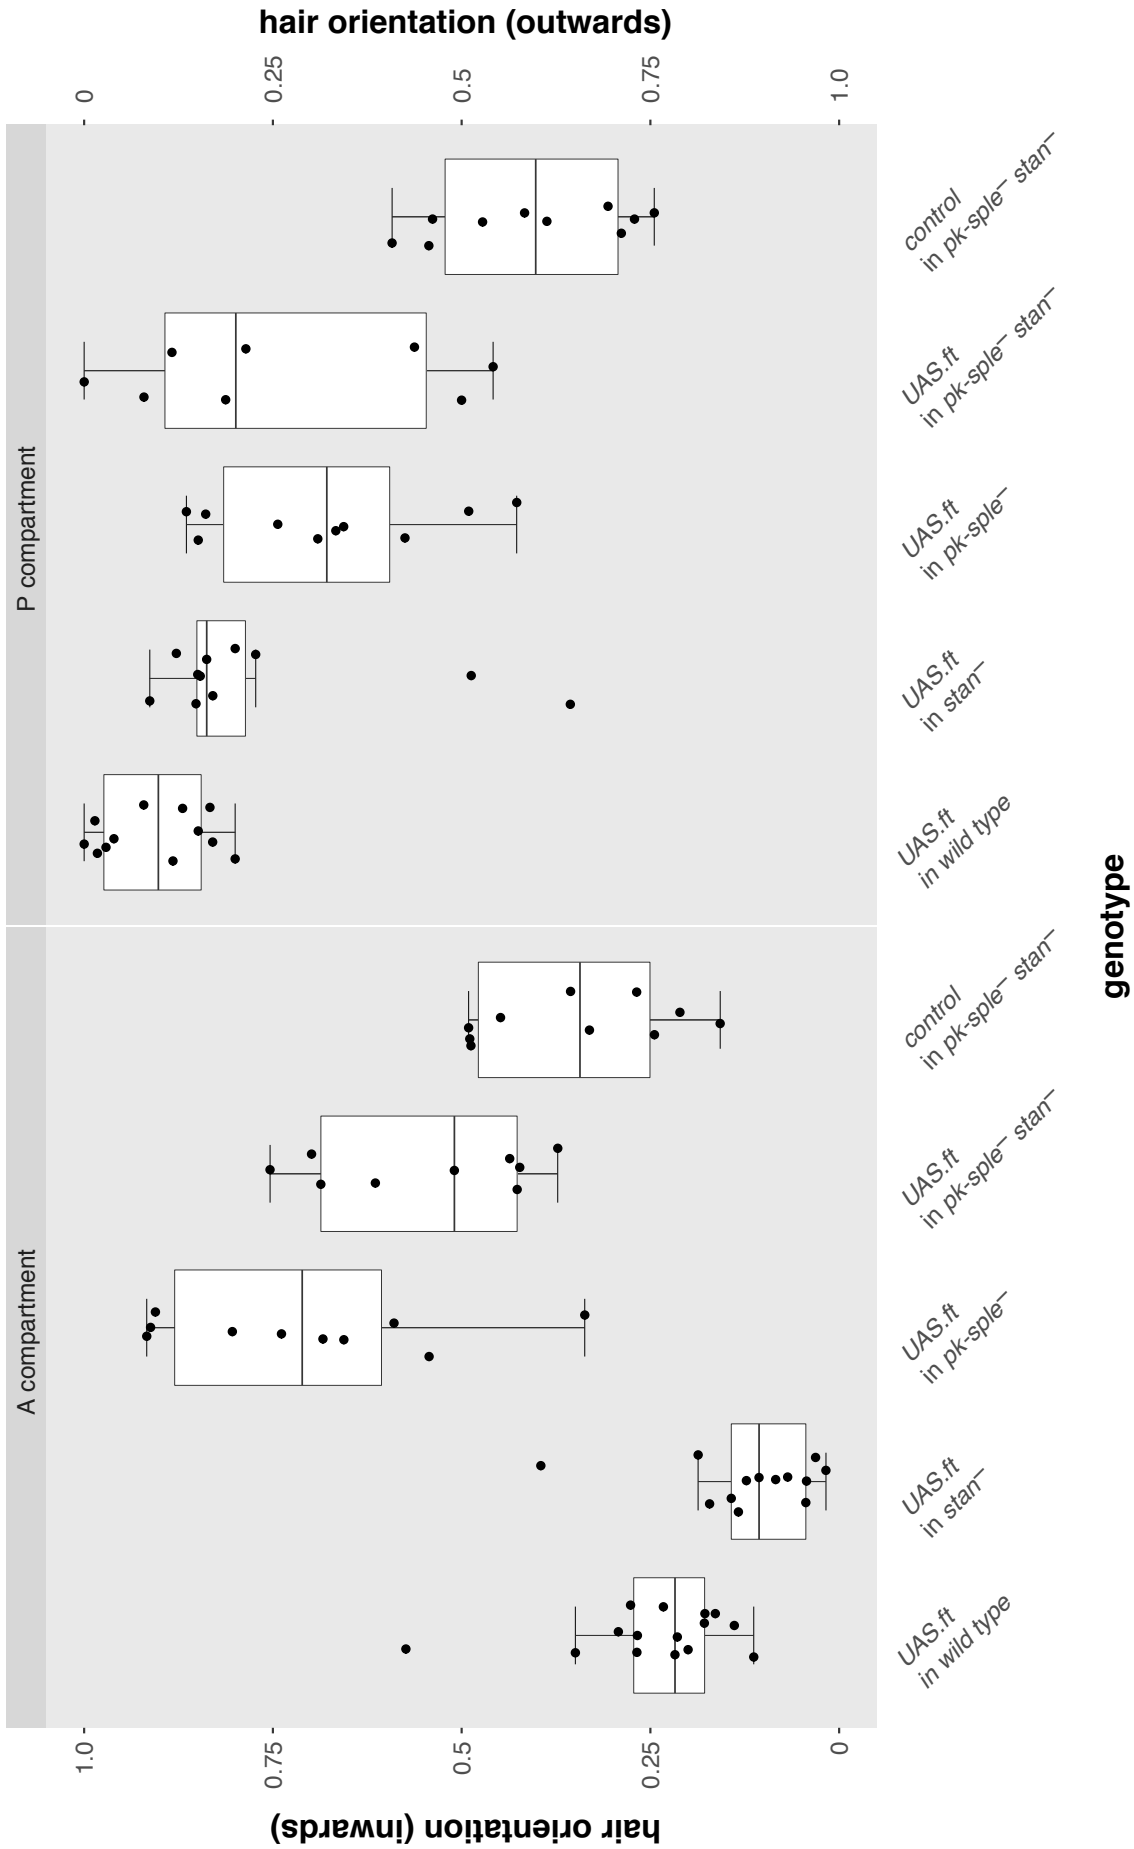

figure 3

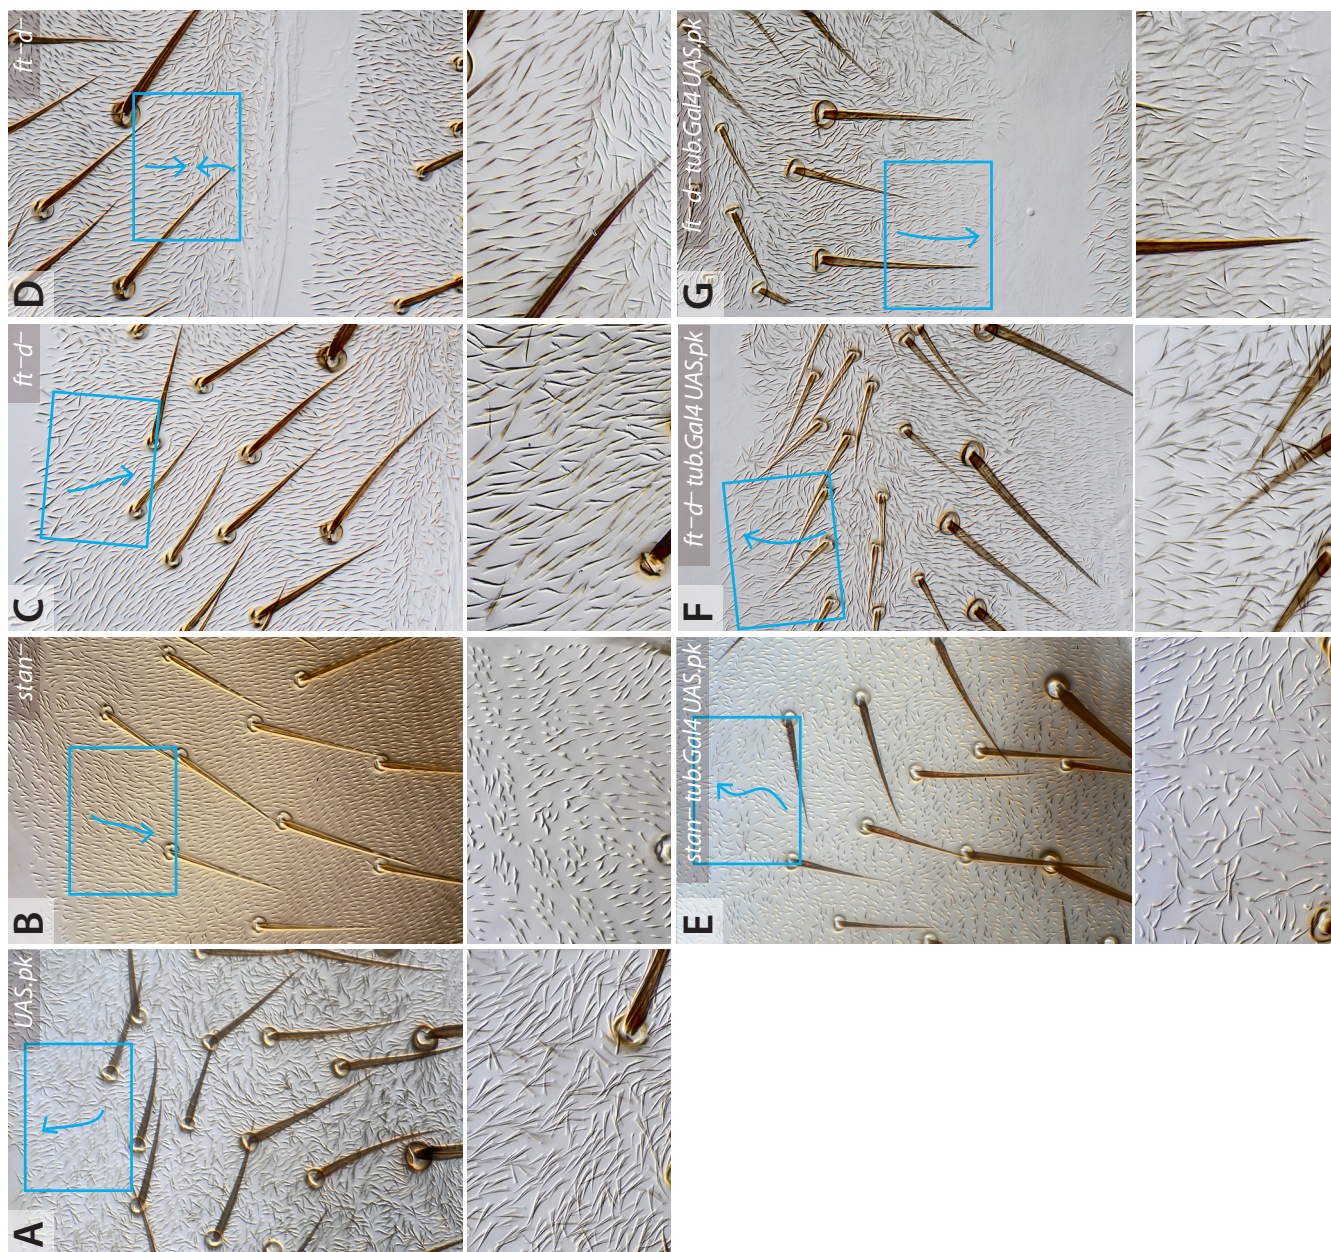

figure 4

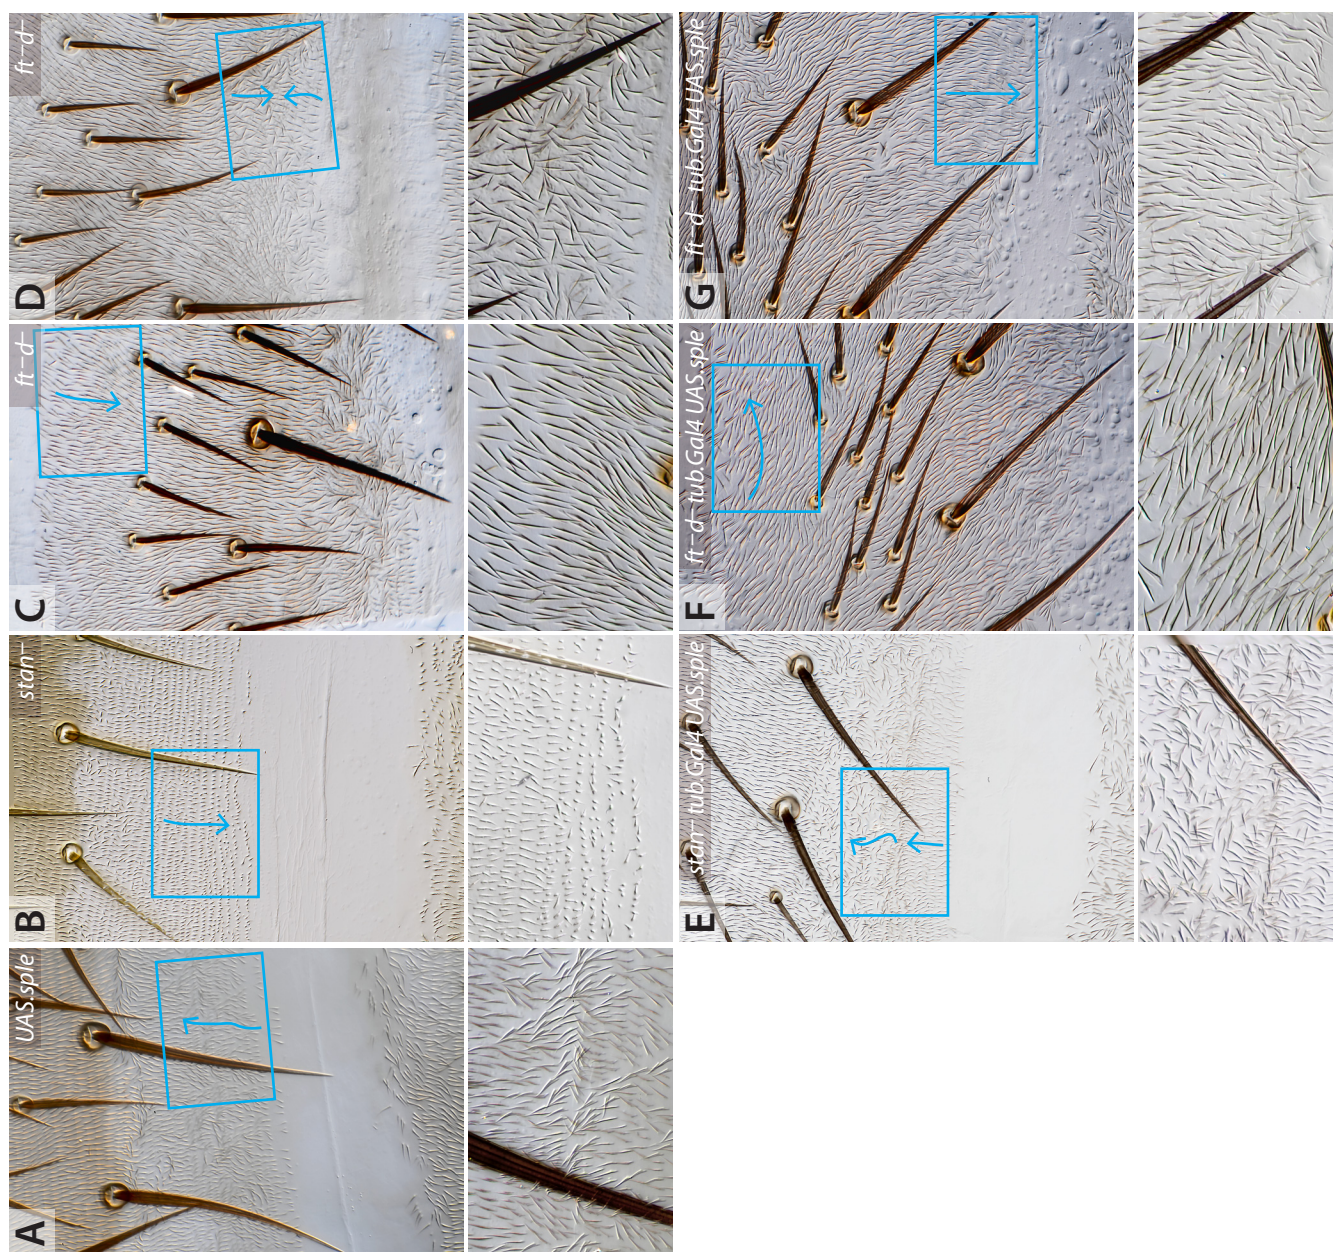

figure 5

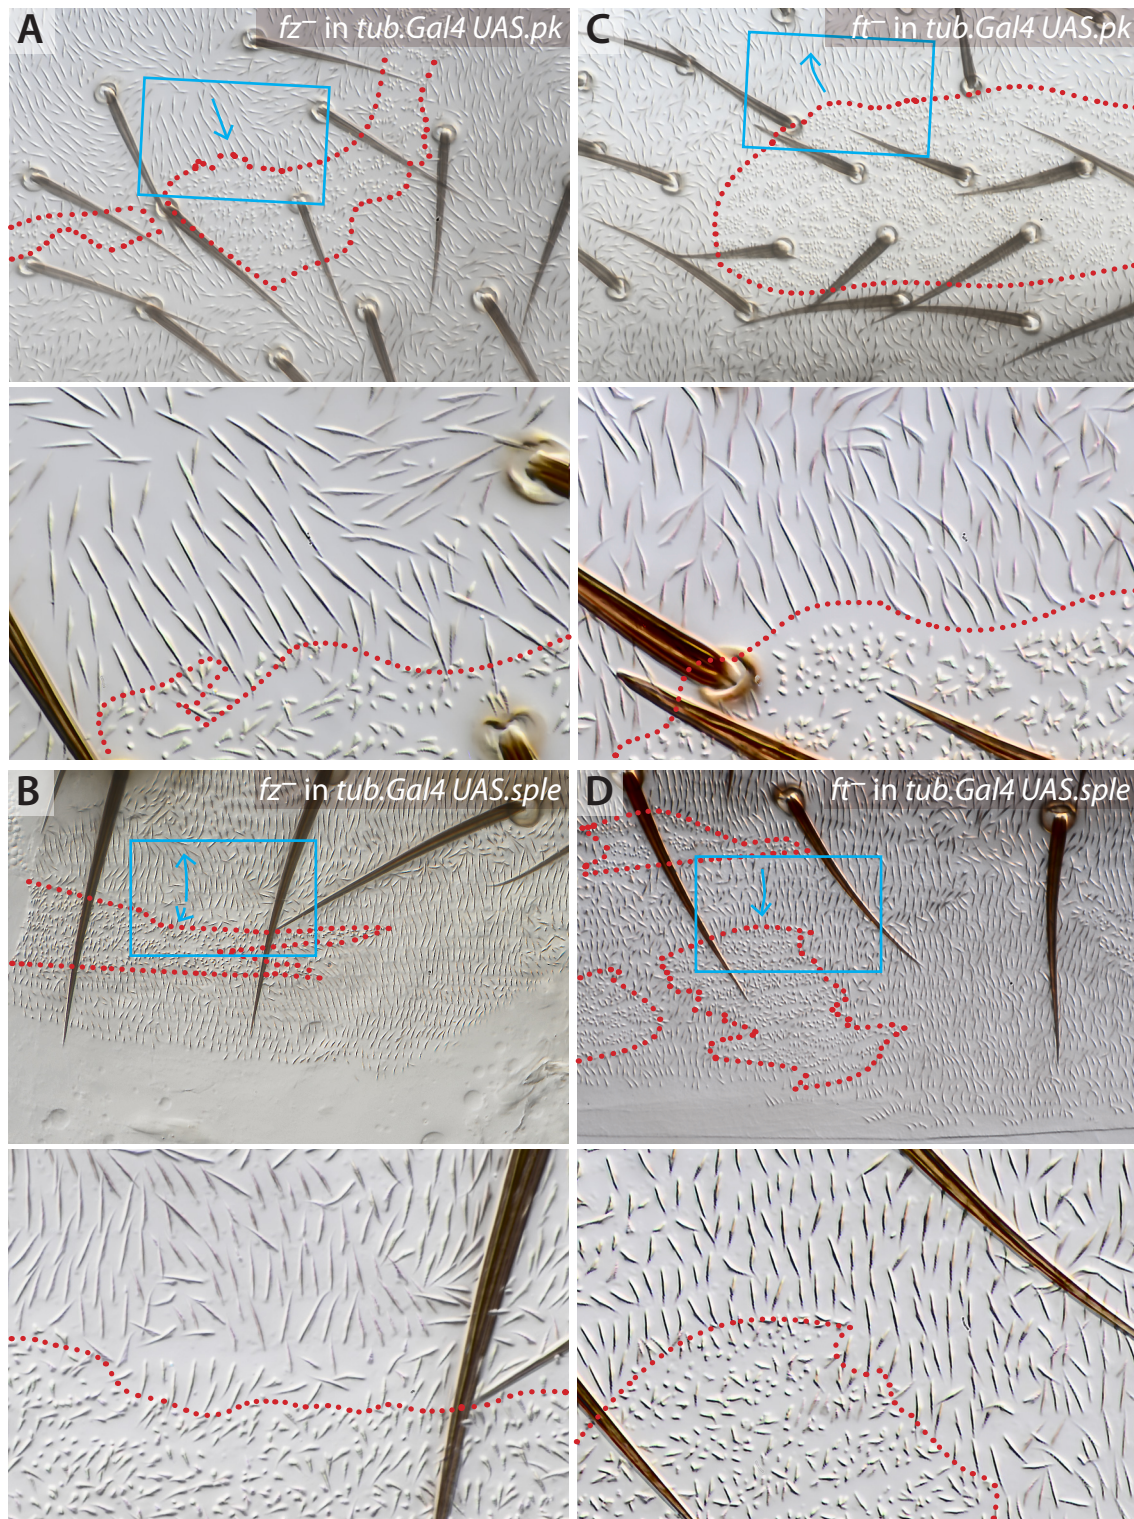

figure 6

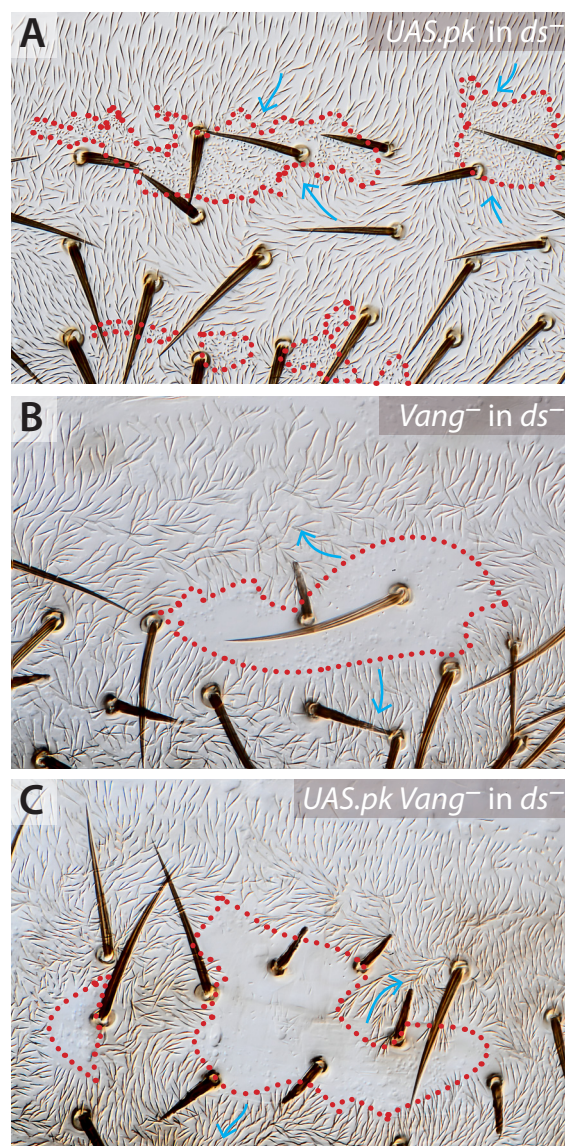

figure 7

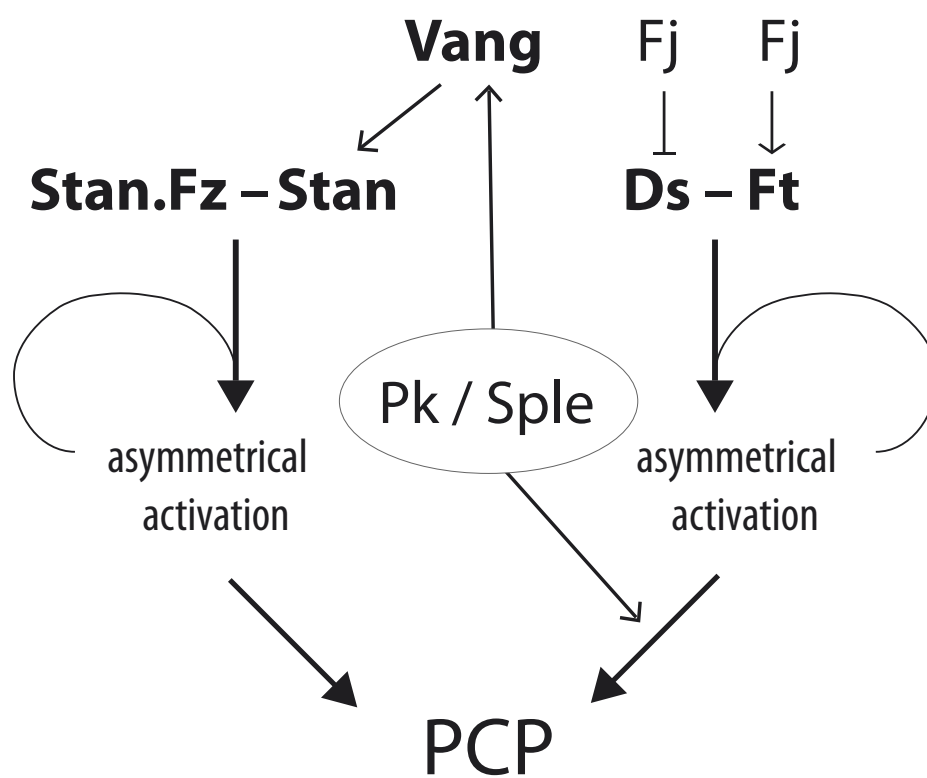

figure 8

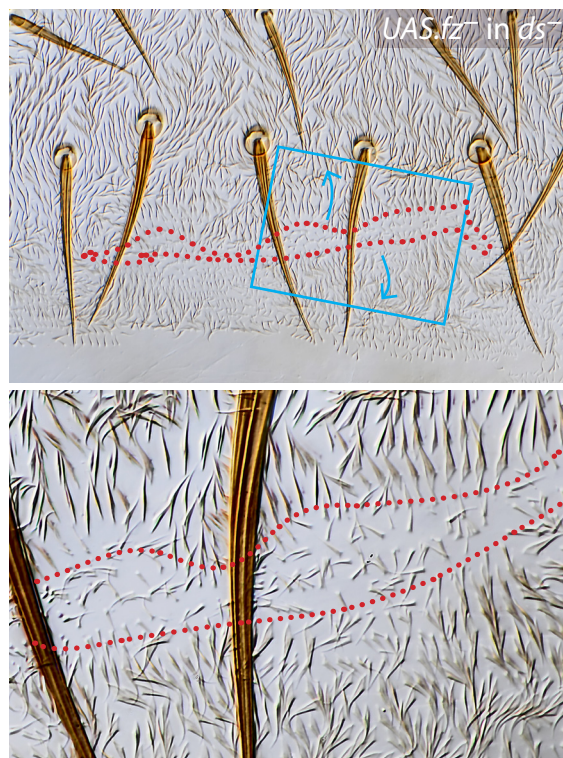

figure S1

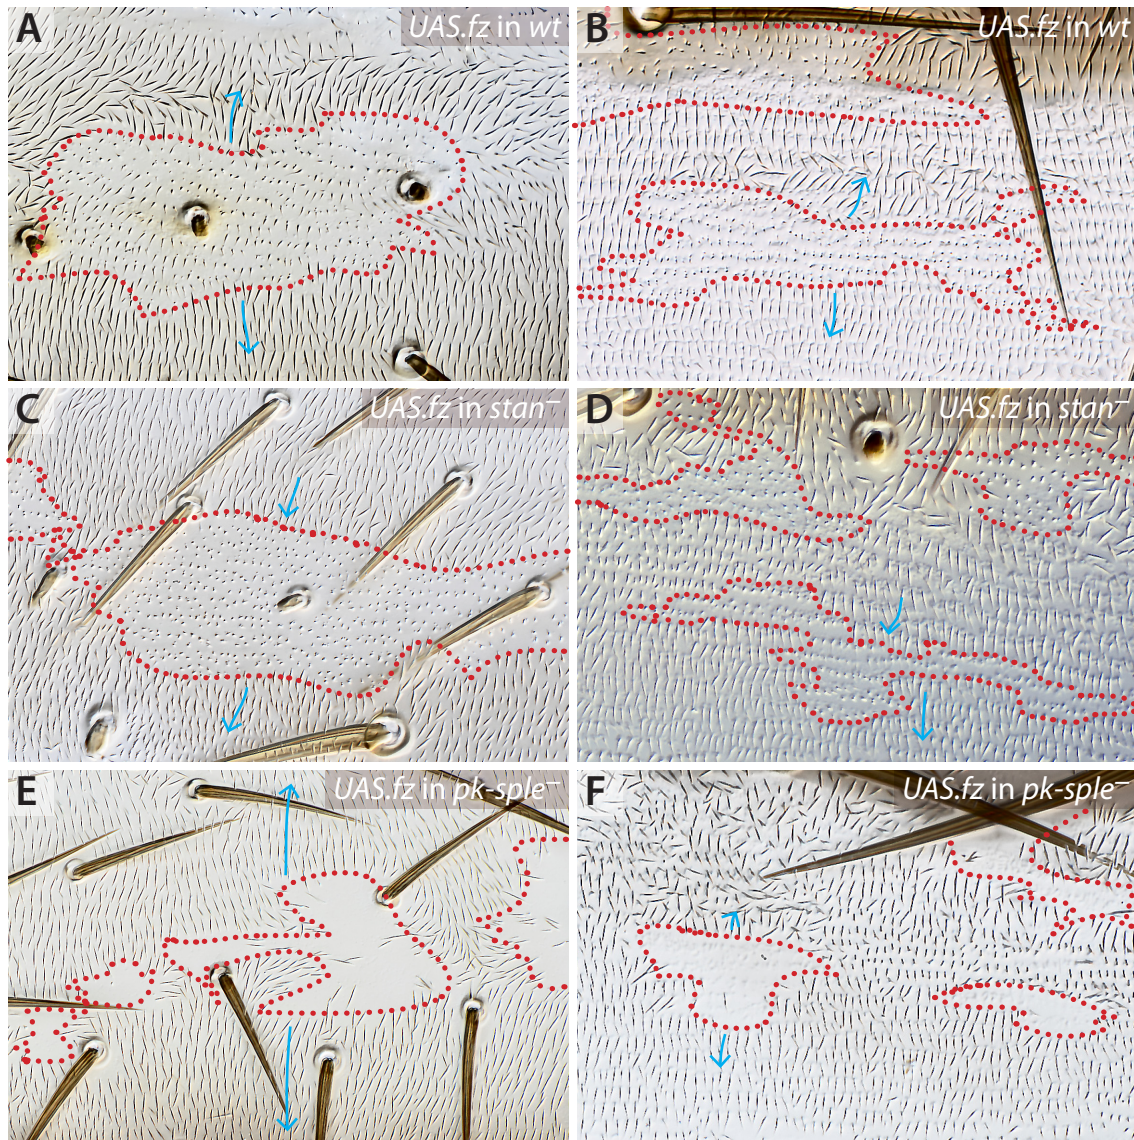

figure S2



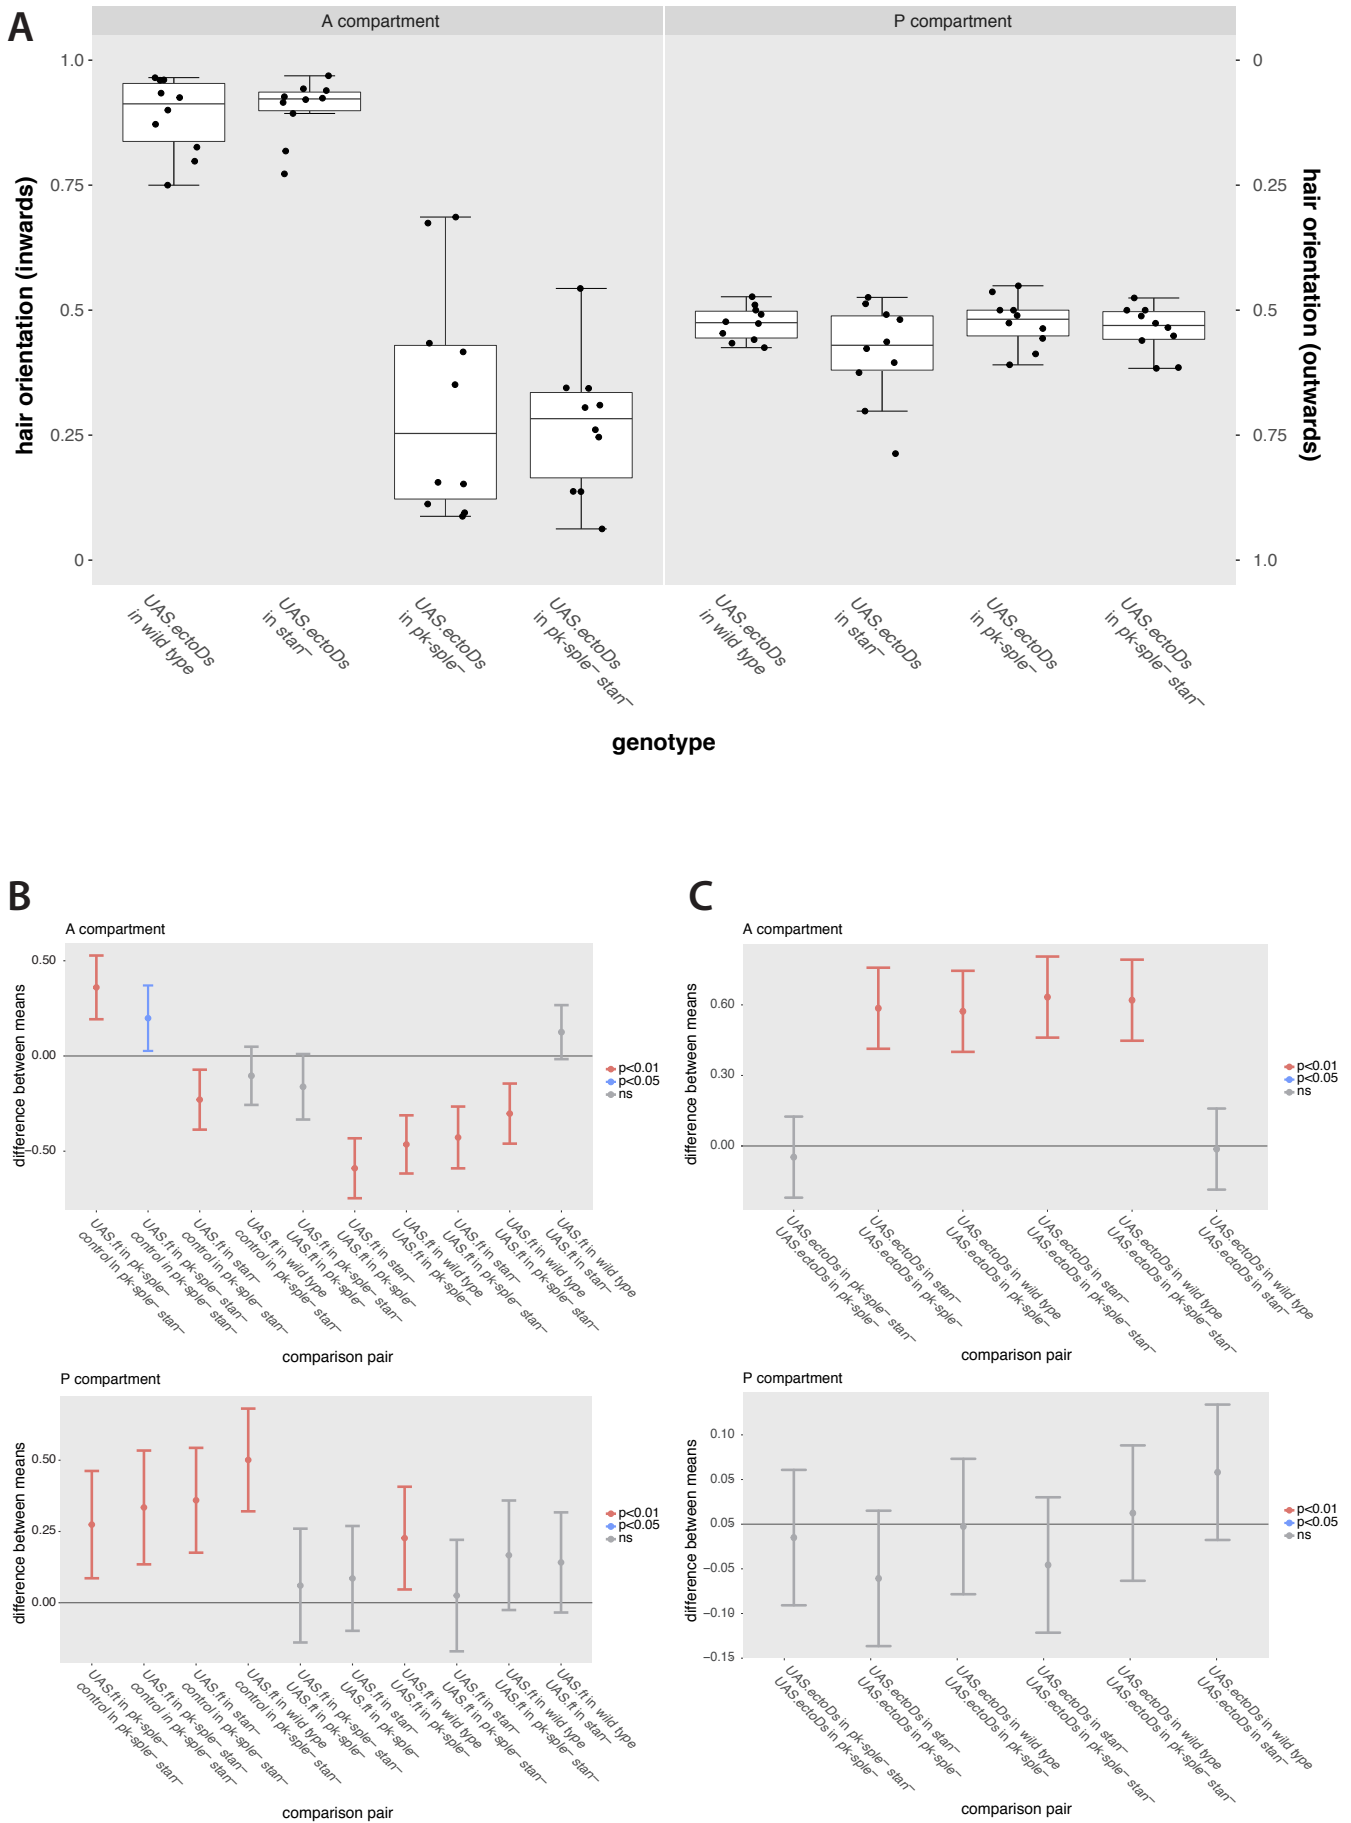

figure S3

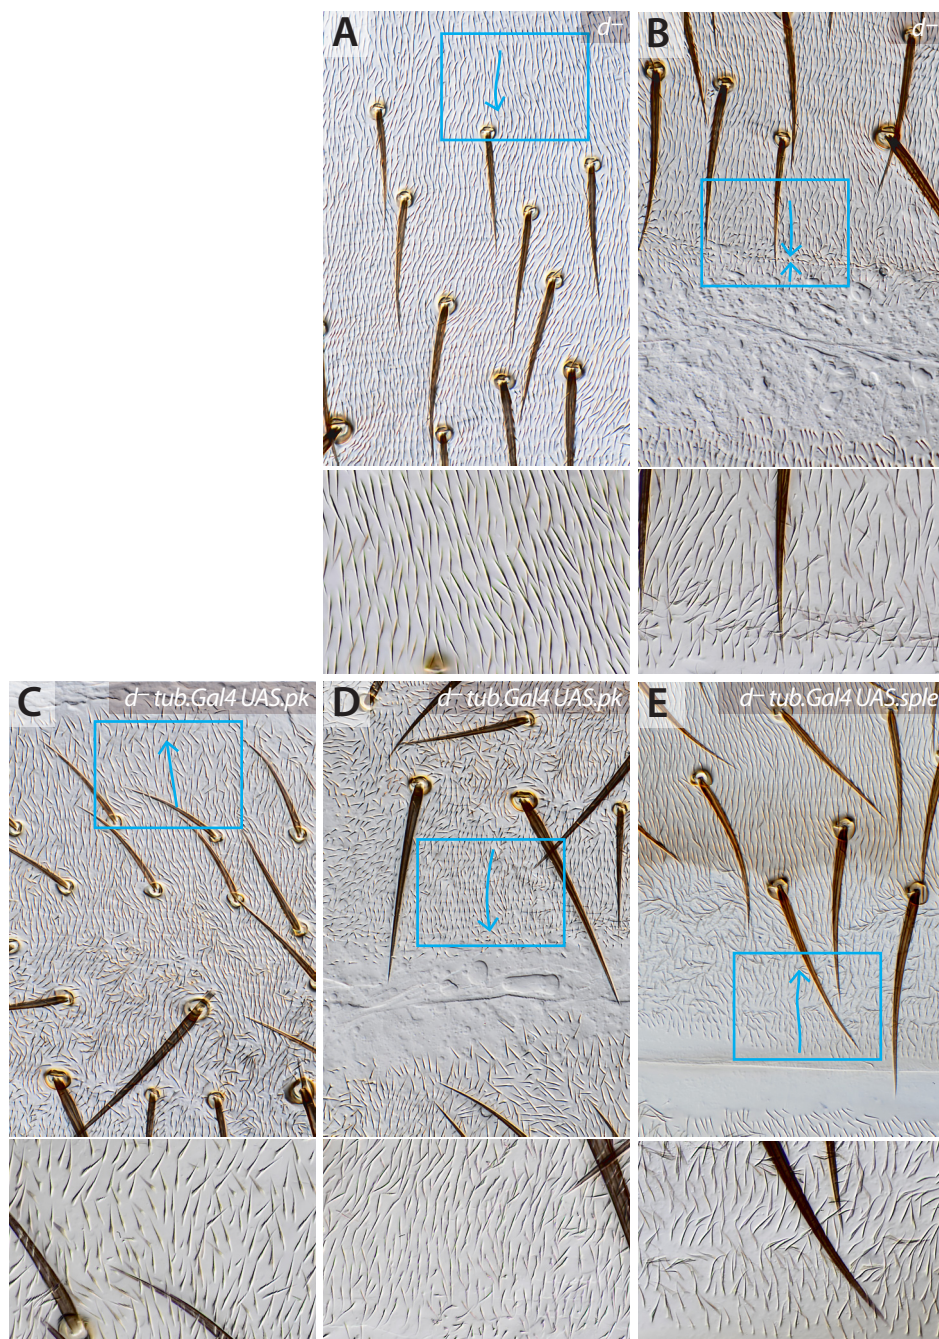

figure S4

**A**

Maximum range of polarisation around *fz*<sup>-</sup> clones

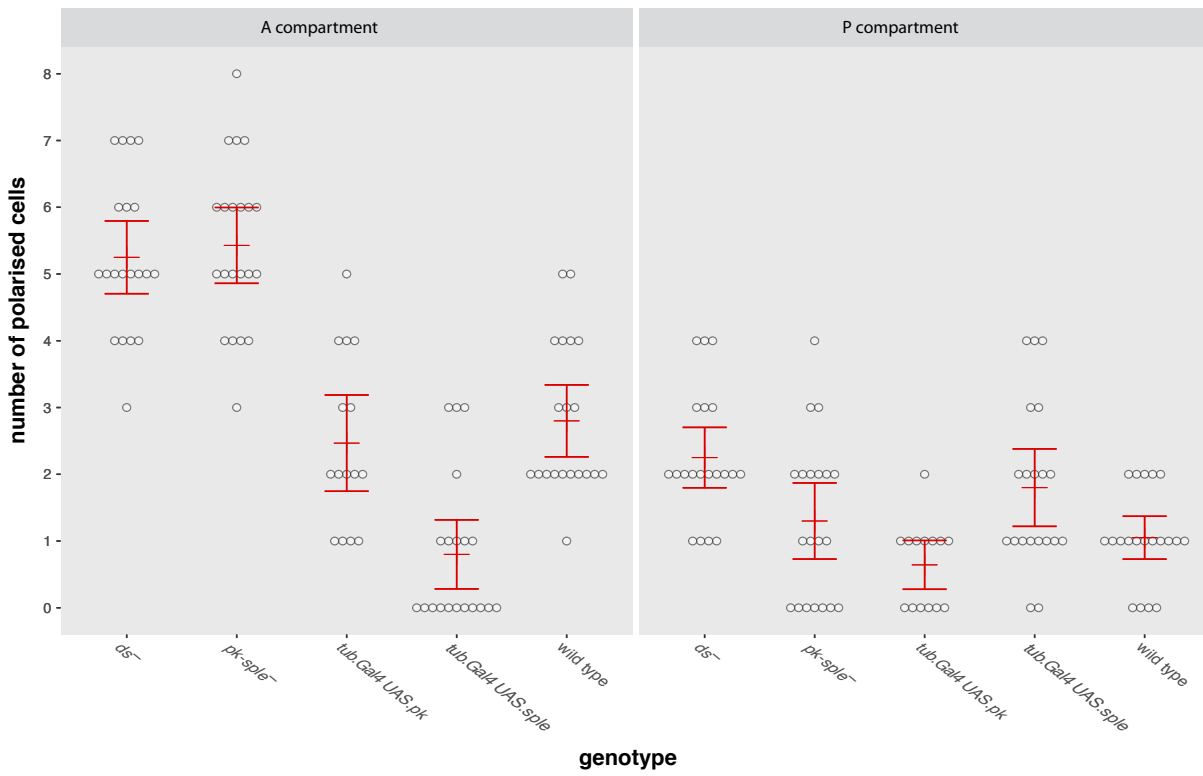

**B**

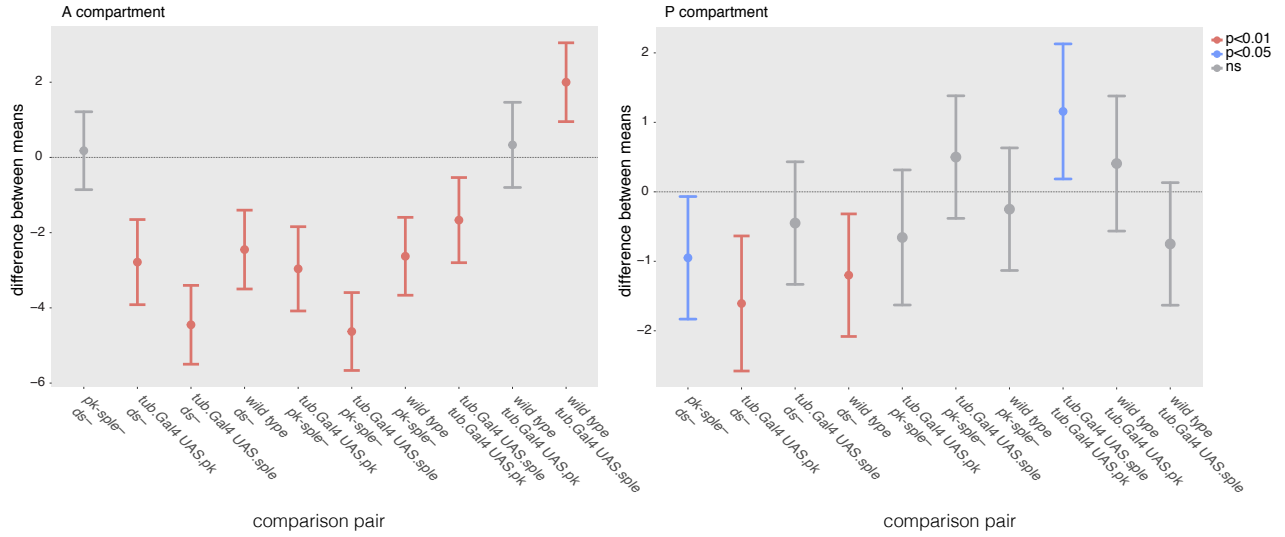

figure S5
